# Supplementary material for: MetaInvert: A new soil invertebrate genome resource provides insights into below-ground biodiversity and evolution
Source: Research Square preprint supplement (doi:10.21203/rs.3.rs-2706746/v1), 2023-03-27
Supplement: Supplementary file 1 [file 017e4f4335cc7c08dfbbb754.xlsx]

## Sheet: Sheet1
GO.ID	Term	Annotated	Significant	Expected	testFisher	missing	GO group
GO:0034660	ncRNA metabolic process	64	5	3.71	0.028	Oribatida	biological process
GO:0034470	ncRNA processing	39	5	2.26	0.015	Oribatida	biological process
GO:0008033	tRNA processing	18	4	1.04	0.02	Oribatida	biological process
GO:0007010	cytoskeleton organization	17	3	0.98	0.031	Oribatida	biological process
GO:0007017	microtubule-based process	14	3	0.81	0.038	Oribatida	biological process
GO:0006928	movement of cell or subcellular component	12	3	0.69	0.025	Oribatida	biological process
GO:0032268	regulation of cellular protein metabolic process	8	2	0.46	0.036	Oribatida	biological process
GO:0031981	nuclear lumen	28	4	2.06	0.0436	Oribatida	cellular component
GO:0000228	nuclear chromosome	7	3	0.51	0.0211	Oribatida	cellular component
GO:0042995	cell projection	6	3	0.44	0.0065	Oribatida	cellular component
GO:0043169	cation binding	87	7	4.96	0.044	Oribatida	molecular function
GO:0016788	hydrolase activity, acting on ester bonds	40	5	2.28	0.028	Oribatida	molecular function
GO:0072524	pyridine-containing compound metabolic process	5	2	0.15	0.0058	Collembola	biological process
GO:0072525	pyridine-containing compound biosynthetic process	5	2	0.15	0.0061	Collembola	biological process
