# Supplementary material for: MetaInvert: A new soil invertebrate genome resource provides insights into below-ground biodiversity and evolution
Source: Research Square preprint supplement (doi:10.21203/rs.3.rs-2706746/v1), 2023-03-27
Supplement: Supplementary file 2 [file 0b0c4ab909edd072e32f6744.xlsx]

## Sheet: summary
	sampling method	no of species	body parts for sequencing	individuals / DNA extract	origin	species identification	Voucher acquisition
Isopoda	hand sorting	3	1 leg	1	field	voucher before DNA extraction	remaining body
Chilopoda	hand sorting	19	1 leg or musculature of mouthparts	1	1 culture, 18 field/collection	voucher before DNA extraction	remaining body
Diplopoda	hand sorting	23	1 leg or musculature of mouthparts	1	field/collection	voucher before DNA extraction	remaining body
Symphyla	soil sample	2	whole body	1	field	voucher after DNA extraction	whole body
Diplura	soil sample	2	whole body	1	field	voucher after DNA extraction	whole body
Pauropoda	soil sample	1	whole body	1	field	voucher after DNA extraction	whole body
Collembola	soil sample or exhaustor	87	whole body	1 or 5	8 culture, 79 field/collection (material from 2011-2020 stored at 5°C)	voucher after DNA extraction	whole body after extraction, 7 conspecific from same sample, 6 vouchers lost
Astigmata	culture	1	whole body	4	culture	clone from same culture	no
Gamasina	soil sample or culture	4	whole body	1	1 culture, 3 field	voucher after DNA extraction	whole body
Oribatida	soil sample	62	whole body	1-23	field	voucher after DNA extraction or barcode comparison	whole body, 10 vouchers lost
Enchytraeidae	soil sample or culture	7	abdomen (last 8-30 segments)	1	1 culture, 6 field	in vivo	remaining body (anterior end)
Lumbricina	hand sorting	1	a few metameres	1	field	voucher before DNA extraction	remaining body
Nematoda	soil sample or culture	18	whole body	1-50,000	13 culture, 5 field	clone from same culture or conspecific from same sample	13 clone from same culture, 5 conspecific from same sample
Tardigrada	culture	2	whole body	15 or 80	culture	clone from same culture	clones from same culture
