# Supplementary material for: MetaInvert: A new soil invertebrate genome resource provides insights into below-ground biodiversity and evolution
Source: Research Square preprint supplement (doi:10.21203/rs.3.rs-2706746/v1), 2023-03-27
Supplement: Supplementary file 3 [file 0ba4db2e91434036bdbb6b59.xlsx]

## Sheet: all_columns_joined
Taxon group	Family	Taxon	NCBI taxid	Total mapped read bases	Mode Coverage	Genome size [bases]	BUSCO C taxon set [%]	BUSCO C metazoan [%]	BUSCO S metazoan [%]	BUSCO F metazoan [%]	BUSCO M metazoan [%]	GC content [%]	Number of contigs	Largest contig	Assembly length	Assembly N50	Assembly N75	Assembly L50	Assembly L75	Repeat content [%]	DNA repeat group (%)	LINEs (%)	SINEs (%)	LTR (%)	Unclassified (%)	Other (%)	Theta	theta min	theta max	Body length [µm]	Reproduction mode	level2 CORINE land cover	Specimen or isolate number	Sampling event number	strain name	Culture	Taxon identified by	NCBI accession number	Sampling date	Country	Region	Sampling site	WGS84(N)	WGS84(E)	n metazoan genes phylogeny	Length size
Astigmata	Acaridae	Tyrophagus putrescentiae	59818	1207152023	11	109741093	85.1	82	80.7	4.2	13.8	45.51	27525	100676	83916096	8623	3693	2532	6274	7.18	0.17	0.69	0	0.35	1.38	4.6	0.0153	0.0153	0.0154	385	sexual	32	mit_ECT_180815_12			yes	Jörg Römbke	SAMN25040917	NA	NA	NA	NA	NA	NA	136	0.764673
Chilopoda	Geophilidae	Geophilus truncorum	173284	6059514734	33	1.83622e+08	82	83.9	82.7	2.9	13.2	35.37	55824	158736	137970002	12647	4669	2694	7169	18.61	0.84	0.11	0	1.22	13.68	2.76	0.00776	0.00774	0.00777	16000	sexual	31;32	Gr-Myr-00805	49176		no	Peter Decker	SAMN25040797	16.10.2013	Germany	Mueritz National Park	Neustrelitz, Praelank	53.3669	12.9846	129	0.751382
Chilopoda	Geophilidae	Pachymerium ferrugineum	115410	8972966946	35	2.5637e+08	81.4	83.8	82.1	2.4	13.8	34.86	28015	419682	118440925	28065	8038	1001	2991	14.07	0.63	0.52	0	1.83	9.64	1.45	0.00683	0.00682	0.00685	42500	sexual	23;41	Gr-Myr-00697	59102		no	Peter Decker	SAMN25040865	01.05.2018	Czech Republic	Cesky Dub	Teufelsmauer	50.6765	14.9472	124	0.461991
Chilopoda	Geophilidae	Geophilus carpophagus	173285	9908749188	50	1.98175e+08	81.9	82.1	79.7	4.7	13.2	31.48	48138	163627	141094696	7988	3281	3998	10984	28.23	2.85	0.29	0	3.62	18.66	2.81	0.00999	0.00997	0.01	50000	sexual	11;14;22;31	Gr-Myr-00712	VNR 017292-1		no	Peter Decker	SAMN25040795	19.01.2017	Germany	Darß, Zingst	Einfamilienhaus	54.4357	12.6888	116	0.71197
Chilopoda	Dignathodontidae	Henia vesuviana	126936	9063733151	25	362549326	79.9	80.2	79.4	5.5	14.3	34.44	79246	525794	147806093	5412	1975	5724	17204	35.31	1.18	0.2	0	12.4	19.23	2.3	0.022	0.0219	0.022	72500	sexual	11;12;14;22;31	Gr-Myr-00681	64078		yes	Peter Decker	SAMN25040805	NA	Germany	Leipzig	NA	51.3	12.3	120	0.407685
Chilopoda	Linotaeniidae	Strigamia crassipes	1428135	9684034181	33	2.93456e+08	77.3	78.7	76.9	7.2	14.1	36.42	32290	350636	130928435	14153	5874	1993	5652	32.57	1.73	0.38	0.01	4.74	21.92	3.79	0.0075	0.00748	0.00751	40000	sexual	21;23;31;32	Gr-Myr-00763	64070		no	Peter Decker	SAMN24116358	2018	Italy	Rio Radina valley, near Arta Terme	NA	46.4835	13.0336	119	0.446161
Chilopoda	Cryptopidae	Cryptops parisi	173049	9273714617	17	5.45513e+08	77.6	77	76.6	5.8	17.2	34.86	70584	184042	304973929	14694	6446	5418	13262	34.73	3.19	2.28	0.02	0.85	25.85	2.54	0.00781	0.0078	0.00782	22500	sexual	23;31;32	Gr-Myr-00693	VNR 018268		no	Peter Decker	SAMN25040766	19.10.2019	France	Haute-Loire, Retournac, Vousse	im Dorfbereich	45.2071	4.0103	118	0.559059
Chilopoda	Geophilidae	Stenotaenia linearis	1569481	8893373568	30	2.96446e+08	76.3	76.3	74.6	7.9	15.8	36.39	77105	292767	148509521	7925	2655	3624	11867	25.19	0.77	0.59	0	4.28	17.46	2.09	0.012	0.012	0.012	45000	sexual	14;21;31;32	Gr-Myr-00711	VNR 016705-1		no	Peter Decker	SAMN25040905	23.03.2014	Germany	Unna	Selm, NSG Lippeaue	51.6512	7.4459	116	0.500967
Chilopoda	Linotaeniidae	Strigamia acuminata	1255758	8579800341	NA	NA	76.6	75.7	74.5	5.3	19	37.03	38078	209222	131006408	11465	4826	2672	7092	27.35	1.38	0.13	0	3.3	19.48	3.06	NA	0.00802	0.00806	27500	sexual	21;23;31;32	Gr-Myr-00766	VNR 18605-6		no	Peter Decker	SAMN24116360	19.10.2019	Germany	Chorin, Joachimsthal, Glambeck, Poratz Morainic landscape, NSG Hechtdiebel bog	Glambeck, Hechtdiebel, Erlenbruch in der Lag-Zone des Moores	53.045	13.8135	116	NA
Chilopoda	Geophilidae	Geophilus flavus	856749	9671212852	12	8.05934e+08	70.2	71.8	70.6	13	15.2	35.41	84452	141866	187287486	5668	2267	7957	21183	30.27	1.18	0.1	0.01	0.94	25.84	2.2	0.0199	0.0199	0.02	35000	sexual	12;13;14;19;21;23;31;32	Gr-Myr-00078	59109		no	Peter Decker	SAMN25040796	10.05.2018	Germany	Tharandt	Forstbotanischer Garten	50.982	13.5765	106	0.232386
Chilopoda	Linotaeniidae	Strigamia transsilvanica	1579475	8421985977	40	2.1055e+08	70.7	70.2	68.3	5.5	24.3	37.18	31224	241265	124448141	12431	5043	2342	6319	29.64	3.57	0.25	0.01	3.44	19.72	2.65	0.00954	0.00953	0.00956	40000	sexual	21;23;31;32	Gr-Myr-00699	VNR 018048-5		no	Peter Decker	SAMN25040907	04.11.2017	Germany	Jena, Leutratal	bei Leutrahuette	50.8678	11.5213	107	0.591063
Chilopoda	Himantariidae	Haplophilus subterraneus	173289	9787608543	55	177956519	65.3	65.2	64.8	18.1	16.7	34.65	72551	258840	140039980	4472	1726	6662	19377	16.66	1.35	0.28	0.02	1.23	11.65	2.13	0.0161	0.0161	0.0162	55000	sexual	11;12;14;22	Gr-Myr-00680	64068		no	Peter Decker	SAMN25040802	31.05.2020	Germany	Goerlitz, Weinhuebel	Weinhuebel	51.1229	14.9661	100	0.786934
Chilopoda	Schendylidae	Schendyla nemorensis	1147033	10815642086	4	2703910522	16.7	15.2	14.9	28.4	56.4	36.4	296016	24403	228255718	1296	498	42933	112983	25.78	0.41	0.13	0.02	0.42	23.74	1.06	0.0226	0.0226	0.0227	17000	parthenogenetic	14;23;31;32;33;41	Gr-Myr-00085	59098		no	Peter Decker	SAMN25040898	10.04.2018	Germany	Ostritz	Klosterwald, Saupantsche	50.9977	14.9118	23	0.0844169
Chilopoda	Lithobiidae	Lithobius crassipes	1147027	8940581411	4	2235145353	11.7	11.5	11.3	25.2	63.3	39.74	672153	38019	650610746	1473	821	126701	274484	38.68	1.26	2.08	0.05	1.02	32.6	1.67	0.0158	0.0158	0.0158	10500	sexual	12;14;21;23;31;32;33;41	Gr-Myr-00709	VNR 017287-3		no	Peter Decker	SAMN25040836	19.06.2016	Germany	Lichtenberg, NSG Hoellental	am ehem. Bahndamm	50.386	11.686	25	0.291082
Chilopoda	Lithobiidae	Lithobius microps	1569488	8500866510	3	2833622170	11	11.3	11.2	24.1	64.6	39.84	1024156	51930	772434526	1068	535	208566	459680	40.73	1.79	1.24	0.05	0.59	35.01	2.05	NA	0.0171	0.0171	14500	sexual	12;13;14;21;23;31;32;33	Gr-Myr-00702	59107		no	Peter Decker	SAMN25040839	18.05.2016	Germany	Hirschfelde	Saupantsche, Graben	50.9977	14.9118	28	0.272596
Chilopoda	Lithobiidae	Lithobius forficatus	7552	9205513526	4	2301378382	12	9.6	9.4	18.8	71.6	39.97	859646	24219	769671475	1333	696	167576	362861	41.2	1.39	1.85	0.05	1.75	34.25	1.91	0.0213	0.0213	0.0213	20000	sexual	11;12;13;14;21;22;23;31;32;33;41	Gr-Myr-00701	59102		no	Peter Decker	SAMN25040838	01.05.2018	Czech Republic	Cesky Dub	Teufelsmauer	50.6765	14.9472	32	0.334439
Chilopoda	Lithobiidae	Lithobius agilis	1569484	8227944964	4	2056986241	8.1	5.8	5.8	8.6	85.6	38.84	911691	56142	804023856	1266	711	190131	398668	40.94	1.67	2.51	0	2.35	32.9	1.51	0.0133	0.0133	0.0133	10000	sexual	23;31;32	Gr-Myr-00704	VNR 016542-5		no	Peter Decker	SAMN25040835	19.03.2014	Germany	Bad Muskau	Pusack	51.5913	14.7331	18	0.390875
Chilopoda	Lithobiidae	Lithobius crassipesoides	2015377	8693193961	3	2897731320	3.7	4.1	4.1	9.7	86.2	39.31	798261	22820	586679954	1014	529	171084	368099	41.36	1.61	2.09	0.08	1.2	35.13	1.25	NA	0.0166	0.0166	8500	sexual	NA	Gr-Myr-00708	VNR 017136-4		no	Peter Decker	SAMN25040837	23.04.2009	Spain	Sierra de Urbasa	1km east of road junction to road NA-7182, at site \Bentakaita\""	42.854	-2.1595	14	0.202462
Chilopoda	Lithobiidae	Lithobius nodulipes	1255757	7950200588	3	2650066863	3.3	2.7	2.6	4.8	92.5	39.19	1155602	31180	715328436	789	433	262693	574646	41.91	1.56	1.94	0.03	1.77	35.07	1.54	NA	0.0238	0.0238	12500	sexual	NA	Gr-Myr-00703	59102		no	Peter Decker	SAMN25040841	01.05.2018	Czech Republic	Cesky Dub	Teufelsmauer	50.6765	14.9472	7	0.269928
Chilopoda	Lithobiidae	Lithobius mutabilis	1255756	8487403418	5	1697480684	4.2	2.5	2.4	5	92.5	40.33	1008123	54052	439631111	434	296	267763	580707	38.54	1.86	1.91	0.13	1.87	30.91	1.86	0.0282	0.0281	0.0282	8000	sexual	12;13;14;21;23;31;32;33	Gr-Myr-00099	59107		no	Peter Decker	SAMN25040840	18.05.2016	Germany	Hirschfelde	Saupantsche, Graben	50.9977	14.9118	10	0.25899
Collembola	Isotomidae	Folsomia candida	158441	10459982278	45	2.32444e+08	94.7	91.2	90	2.3	6.5	37.49	68471	356159	212337752	22585	8840	2290	6071	15.82	1.5	0.48	0	1.25	11.39	1.2	0.00167	0.00166	0.00168	2500	sexual	14;21;23;31;32;33;41	Gr-Col-00812	62240		no	Ulrich Burkhardt	SAMN24116334	26.01.2014	Germany	Bremen	NA	53.099	8.81	141	0.9135
Collembola	Sminthuridae	Sphaeridia pumilis	212016	10680250130	54	1.97782e+08	91.1	87.3	56.2	3.7	9	42	39119	205313	168831601	14187	5906	2989	7622	5.03	0.27	0.25	0	0.55	3.39	0.57	0.0359	0.0358	0.0359	500	NA	13;14;21;23;31;32;33;41;42	Gr-Col-00832	BikF.01102020		no	Clément Schneider	SAMN25040903	01.10.2020	Germany	Hesse	Frankfurt	50.1159	8.64954	72	0.853623
Collembola	Katiannidae	Gisinianus flammeolus	2449080	8847880381	35	2.52797e+08	90.1	84.7	83.1	3.7	11.6	37.44	99086	279280	229104044	26649	8223	2035	5906	13.01	0.62	0.3	0	0.4	7.1	4.59	0.00215	0.00215	0.00216	800	sexual	21;23;31;32	Gr-Col-00644	52192		no	Ulrich Burkhardt	SAMN21015781	30.11.2014	Germany	Ostritz	Neißetal	50.9707	14.9027	132	0.906278
Collembola	Arrhopalitidae	Pygmarrhopalites spinosus	187608	8354033793	41	2.03757e+08	90	60.3	59.1	5.6	34.1	34.28	42344	310405	180989119	33024	13281	1438	3585	8.2	0.55	0.14	0	0.15	4.63	2.73	0.00189	0.00188	0.0019	500	NA	31	Gr-Col-00816	59263		no	Ulrich Burkhardt	SAMN24116338	15.07.2019	Germany	Heidelberg	Fichtenforst	49.4677	8.74336	107	0.88826
Collembola	Entomobryidae	Entomobrya multifasciata	247613	8685359421	20	4.34268e+08	89.5	85.1	83.5	3.6	11.3	36.62	137464	152736	323878302	13998	5756	5982	14900	9.93	0.27	0.63	0	0.63	7.05	1.35	0.0187	0.0187	0.0188	1500	sexual	13;21;22;23;31;33;41;42	Gr-Col-00817	62247		no	Ulrich Burkhardt	SAMN24116339	07.10.2018	Germany	Bremen	Ritterhude	53.196	8.7488	136	0.745803
Collembola	Isotomidae	Proisotoma minuta	301521	2803088813	19	1.47531e+08	89.2	84	83.3	2.9	13.1	34.59	17785	188917	111226772	16750	6133	1610	4373	8.15	0.53	0.18	0	0.3	5.91	1.23	0.0135	0.0135	0.0135	1100	sexual	13;21;23;31;32;33;41;42	Gr-Col-00128		ECT, Zucht 6	yes	Jörg Römbke	SAMN25040886	Before 2013	Denmark	Jutland	NA	55.45	9.08333	134	0.753921
Collembola	Isotomidae	Agrenia bidenticulata	1933610	9844711954	45	2.18771e+08	88.9	82.1	80.4	3.1	14.8	31.44	67181	412229	342694124	13555	5049	5305	15866	30.72	3.27	0.28	0	1.03	25.17	0.97	0.0268	0.0268	0.0268	1900	sexual	31;32;33;41;51	Gr-Col-00670	62169		no	Ulrich Burkhardt	SAMN25040744	30.08.2013	Switzerland	Upper Engadine	Bernina, Val Minor	46.4332	10.0358	136	1.56645
Collembola	Isotomidae	Hydroisotoma schaefferi	301519	10175765810	53	1.91996e+08	88.6	85.3	84.7	3.7	11	37.05	21992	252447	146750654	33114	15878	1255	2846	8.43	0.2	0.15	0	0.27	6.67	1.14	0.00341	0.0034	0.00342	1350	sexual	51	Gr-Col-00807	62244		no	Ulrich Burkhardt	SAMN25040810	30.11.2014	Germany	Ostritz	Neißetal, Saupantschebach	50.9714	14.8995	133	0.764344
Collembola	Tomoceridae	Tomocerus mixtus	58788	10519419103	33	3.1877e+08	88.6	84.1	82.4	5.1	10.8	34.04	52155	296328	270705922	19921	8514	3666	8816	8.01	0.16	0.2	0	0.16	5.43	2.06	0.00429	0.00428	0.00429	1800	sexual	31	Gr-Col-00779	62492		no	Ulrich Burkhardt	SAMN24116367	23.02.2020	Germany	Ostritz Klosterwald	Heidrichstein	51.009	14.8943	133	0.849219
Collembola	Sminthuridae	Allacma fusca	39272	9525626675	29	3.2847e+08	88.6	83.7	82.3	2.8	13.5	37.23	61399	446368	270993476	23126	7643	2483	7660	16.52	1.07	0.73	0	0.97	12.17	1.58	0.00502	0.00502	0.00504	4000	sexual	14;21;22;23;31;32;33;51	MI_479	CS.361		no	Clément Schneider	SAMN25040745	NA	Romania	NA	NA	46.6085	25.5777	131	0.825018
Collembola	Tomoceridae	Pogonognathellus longicornis	707266	12693519102	33	384652094	88.2	84.4	83.2	5.3	10.3	34.2	63695	229075	313353787	14121	5817	5406	14137	21.67	0.72	0.61	0	0.33	18.47	1.54	0.00511	0.0051	0.00512	5000	sexual	23;31;32;33	Gr-Col-00778	59327		no	Ulrich Burkhardt	SAMN24116366	16.05.2019	Germany	Oberhausen	Welchenhausen	50.1581	6.14289	135	0.814642
Collembola	Isotomidae	Isotomiella minor	370032	2065295219	10	2.0653e+08	88.1	82.6	82.2	4.5	12.9	42.04	95633	79999	146152048	7136	2359	4934	13911	4.51	0.18	0.22	0	0.28	2.62	1.21	0.0239	0.0239	0.024	1100	NA	11;13;21;23;31;32;33;41;42;51	Gr-Col-00113	59094		no	Juergen Schulz	SAMN25040817	13.11.2017	Germany	Darmstadt	Fachhochschule	49.8684	8.68044	133	0.707657
Collembola	Arrhopalitidae	Disparrhopalites patrizii	2926737	7858694024	23	3.41682e+08	87	83.1	82.2	3.8	13.1	37.65	59846	224531	296188866	15437	6481	4911	12282	15.94	0.68	0.14	0	0.81	9.63	4.68	0.00342	0.00342	0.00343	1000	sexual	21;31;33	CS333	CS333		no	Clément Schneider	SAMN25040777	NA	France	NA	NA	48.8249	2.208	133	0.866854
Collembola	Katiannidae	Sminthurinus signatus	2584529	5917543062	17	3.48091e+08	86.9	85.7	84.9	3.5	10.8	34.51	103373	196132	292000776	15526	5137	4412	12688	16.48	0.42	0.24	0	0.32	9.55	5.95	0.0235	0.0234	0.0235	750	sexual	31	Gr-Col-00809	52192		no	Ulrich Burkhardt	SAMN24116331	30.11.2014	Germany	Ostritz	Neißetal	50.9707	14.9027	133	0.838864
Collembola	Sminthuridae	Lipothrix lubbocki	1387126	8736293726	25	349451749	86.6	81.9	80.6	4.3	13.8	37.36	197270	540016	304426748	14722	3586	3564	14194	13.31	0.35	0.88	0	0.7	9.46	1.92	0.00978	0.00977	0.00979	2000	parthenogenetic	23;31;32;33;41	Gr-Col-00650	59323		no	Ulrich Burkhardt	SAMN25040834	14.06.2014	Germany	Mueritz National Park	Babke, am Havelbach	53.3621	12.9099	131	0.871155
Collembola	Neelidae	Megalothorax n. sp. (minimus-group)	2340290	4624100954	19	2.43374e+08	86.2	82.6	81.4	5.3	12.1	29.92	61647	122865	178683362	15339	6249	3044	7514	13.11	0.22	0.15	0.01	0.13	9.36	3.24	0.011	0.011	0.0111	500	parthenogenetic	21;23;31;32;33;41;42	Gr-Col-00868	CS.384		no	Clément Schneider	SAMN25040843	30.10.2020	Germany	Hesse	Frankfurt	50.1159	8.64954	130	0.734193
Collembola	Entomobryidae	Heteromurus nitidus	254095	5160244406	22	2.34557e+08	86.1	81.2	79.6	5.1	13.7	38.54	40721	303373	200589433	18720	6408	2251	6940	5.93	0.21	0.14	0	0.26	4.17	1.15	0.0049	0.00489	0.00491	2000	sexual	13;14;21;23;31;32;33;41;42	Gr-Col-00111		ECT, Zucht 5	yes	Ulrich Burkhardt	SAMN25040809	Before 2013	Italy	Rome	NA	41.9833	12.5833	121	0.855186
Collembola	Katiannidae	Sminthurinus aureus	1496267	6450729798	17	379454694	85.8	84.1	82.5	6	9.9	35.34	108388	135257	306826501	14466	5589	5384	13896	18.76	0.28	0.51	0	0.3	11.33	6.34	0.0108	0.0108	0.0108	1000	NA	11;12;13;14;21;23;31;32;33;41;42;51	Gr-Col-00643	52193		no	Ulrich Burkhardt	SAMN25040900	02.05.2014	Portugal	Figueira da Foz	Maiorca	40.1601	-8.76069	137	0.808599
Collembola	Isotomidae	Isotomurus pseudopalustris	36142	9708956143	54	1.79795e+08	85.7	79	78.4	6.5	14.5	38.87	56040	134094	146745646	7274	2823	4724	12857	7.39	0.23	0.52	0	0.77	4.6	1.27	0.00981	0.0098	0.00983	3100	sexual	32;33	Gr-Col-00629	62125		no	Ulrich Burkhardt	SAMN25040822	22.04.2012	Germany	Goerlitz	Weinhuebel Ost. Neißeufer	51.1184	14.9913	130	0.816181
Collembola	Sminthuridae	Spatulosminthurus flaviceps	NA	10519872053	30	3.50662e+08	85.5	80.7	79.2	7.1	12.2	36.04	91907	321936	308653301	10442	3969	6299	18566	19.85	0.3	1.14	0	0.61	16.29	1.51	0.009	0.00899	0.00901	1600	sexual	23;31	Gr-Col-00810	59322		no	Ulrich Burkhardt	SAMN24116332	14.06.2014	Germany	Mueritz National Park	Babke, Havelkanal	53.359	12.8958	130	0.880201
Collembola	Isotomidae	Isotomurus palustris	36144	9183358055	35	2.62382e+08	85.1	81.3	80.9	3.2	15.5	39.99	68247	375185	151974941	13242	4532	2502	7386	5.86	0.13	0.39	0	0.57	3.55	1.22	0.00986	0.00984	0.00988	3400	sexual	12;14;21;23;31;32;33;41;42;51	Gr-Col-00806	62242		no	Ulrich Burkhardt	SAMN25040820	08.10.2011	Germany	Bremen	Ritterhude	53.1961	8.7484	135	0.579213
Collembola	Onychiuridae	Thalassaphorura encarpata	2583954	3586310640	12	298859220	85.1	81.4	79.7	4.8	13.8	36.73	58841	144612	197318900	7828	3105	5877	16107	14.5	0.65	1.23	0	0.32	10.92	1.38	0.0212	0.0212	0.0212	1400	sexual	NA	Gr-Col-00143		ECT, Zucht 2	yes	Ulrich Burkhardt	SAMN25040913	Before 2013	China	NA	NA	NA	NA	131	0.66024
Collembola	Entomobryidae	Willowsia nigromaculata	1302335	10956924450	19	5.7668e+08	83.7	80	78	6.3	13.7	36.65	93353	238223	321991414	14589	5888	5130	13920	12.84	0.22	0.54	0	0.4	10.75	0.93	0.0139	0.0138	0.0139	2500	NA	13;14;21;23;31;32;33	Gr-Col-00659	62123		no	Ulrich Burkhardt	SAMN25040920	13.06.2020	Germany	Leuba	Streuobstwiese	51.0474	14.9486	133	0.558353
Collembola	Sminthurididae	Sminthurides aquaticus	281415	9799706147	58	1.6896e+08	83.5	80.3	79.6	2.4	17.3	42.59	79976	452997	159885335	60729	16313	668	1890	5.04	0.16	0.16	0	0.54	3.35	0.83	0.00482	0.0048	0.00483	1000	sexual	21;31;32;33;41;42;51	Gr-Col-00813	62241		no	Ulrich Burkhardt	SAMN24116335	27.06.2012	Germany	Dubringer Moor	Moorsee und Birkenwald	51.4013	14.1729	127	0.946289
Collembola	Katiannidae	Sminthurinus bimaculatus	187699	5617436786	12	4.6812e+08	83	80.6	79.2	7.9	11.5	32.82	235056	121534	362680240	7342	1761	11609	35990	20.72	0.71	0.39	0.01	1.35	14.66	3.6	0.0176	0.0176	0.0176	1000	sexual	23;31;99	NA	CS332		no	Clément Schneider	SAMN25040901	NA	NA	NA	NA	NA	NA	130	0.77476
Collembola	Dicyrtomidae	Dicyrtoma fusca	1385863	9546187257	22	4.33918e+08	83	80	78.8	7.4	12.6	36.44	78927	227454	340058317	11805	4970	6963	18146	27.16	1.06	1.33	0	1.31	21.53	1.93	0.00777	0.00777	0.00778	2000	sexual	14;21;23;31;32;33;41	Gr-Col-00635	49080		no	Ulrich Burkhardt	SAMN25040773	16.10.2013	Germany	Mueritz National Park	Neustrelitz, Praelank	53.3676	12.9844	121	0.783693
Collembola	Entomobryidae	Lepidocyrtus violaceus	707891	3307533113	12	2.75628e+08	82.9	80.5	79	8.1	11.4	37.88	57914	49631	200163007	6510	3418	9122	19672	4.56	0.11	0.14	0	0.36	2.16	1.79	0.0175	0.0175	0.0175	1500	sexual	21;23;31;32;33;41;42	MetInv-E312	AEG 40 Kempson		no	Clément Schneider	SAMN25040830	NA	NA	NA	NA	NA	NA	134	0.726208
Collembola	Onychiuridae	Orthonychiurus folsomi	2581074	7747966324	NA	NA	82.6	79	78.1	7	14	39.61	70588	212635	145307364	6001	2464	5935	15389	11.36	0.48	0.97	0	0.59	8.52	0.8	NA	0.0114	0.0114	1450	NA	13	Gr-Col-00815	47395		no	Ulrich Burkhardt	SAMN24116337	25.10.2012	Switzerland	Chur	Reichenau-Tamins	46.8321	9.4086	136	NA
Collembola	Tomoceridae	Pogonognathellus flavescens	511703	9457535532	29	3.26122e+08	82	78.1	76.3	9.2	12.7	34.05	81431	333093	297079660	10742	4338	6471	17394	15.67	0.46	0.48	0	0.43	12.89	1.41	0.00741	0.00723	0.00741	5000	sexual	14;21;23;31;32;33;41;51	Gr-Col-00653	61231		no	Ulrich Burkhardt	SAMN25040878	17.03.2019	Germany	Niesky	Sachsenberg	51.2776	14.8645	132	0.910947
Collembola	Neanuridae	Anurida granaria	187597	9436559879	50	1.88731e+08	81.9	78.8	78.3	5.7	15.5	41.57	99682	102809	139076966	4648	1605	6941	19530	13.85	0.61	1.23	0	0.29	10.85	0.87	0.0109	0.0109	0.011	2000	NA	21;23;31;32;33;41;42;51	Gr-Col-00639	48993		no	Ulrich Burkhardt	SAMN25040749	20.09.2013	Germany	Goerlitz	Neißeaue	51.1359	14.9914	132	0.736905
Collembola	Orchesellidae	Orchesella flavescens	48711	9878127913	41	2.4093e+08	81.9	75.6	71.6	10.2	14.2	35.81	79987	346656	226836159	8167	3069	5679	17181	9.15	0.34	0.18	0	0.29	6.87	1.47	0.0096	0.0096	0.00971	4000	sexual	11;14;21;23;31;32;33;41;51	Gr-Col-00632	49079		no	Ulrich Burkhardt	SAMN25040863	16.10.2013	Germany	Mueritz National Park	Serrahner Berge	53.3399	13.2053	118	0.941503
Collembola	Entomobryidae	Willowsia buskii	1458441	9023358145	23	3.9232e+08	81.8	77.4	75.6	9.6	13	34.92	179297	185866	309307213	5925	2174	12701	34091	11.39	0.55	0.37	0.05	0.32	8.76	1.34	0.0143	0.0143	0.0143	1800	NA	13;21;23;31;32;33	Gr-Col-00658	62123		no	Ulrich Burkhardt	SAMN25040919	13.06.2020	Germany	Leuba	Streuobstwiese	51.0474	14.9486	131	0.788406
Collembola	Entomobryidae	Entomobrya corticalis	1503966	10456134286	25	4.18245e+08	81.7	77.3	75.8	10.5	12.2	34.19	159160	130759	324962874	5397	2234	14685	38108	12.75	0.26	0.5	0	0.46	10.1	1.43	0.0129	0.0129	0.0129	1750	sexual	23;31;41	Gr-Col-00788	62175		no	Ulrich Burkhardt	SAMN24116376	24.06.2020	Germany	Harz	Ilsenburg	51.8829	10.6462	129	0.776967
Collembola	Hypogastruridae	Xenylla nitida	2567731	5878854649	NA	NA	81.6	78.2	77	8.7	13.1	35.34	91955	61039	120066535	4057	1478	7134	19284	6.45	0.19	0.12	0	0.25	4.06	1.83	NA	0.00833	0.00836	1200	NA	NA	Gr-Col-00808	62243		no	Ulrich Burkhardt	SAMN25040921	28.05.2012	Germany	Ludwigsburg	Karlskaserne	48.8929	9.2	124	NA
Collembola	Entomobryidae	Entomobrya cf arborea	187625	9781554131	34	2.87693e+08	81.4	76.5	75.1	11.1	12.4	34.21	102693	181369	259404019	7014	2674	8774	23884	7.35	0.19	0.35	0.01	0.48	4.93	1.39	0.00937	0.00936	0.00939	NA	sexual	NA	Gr-Col-00668	62167		no	Ulrich Burkhardt	SAMN25040783	29.06.2013	Germany	Stuttgart	Ludwigsburg	48.9098	9.1733	123	0.90167
Collembola	Onychiuridae	Protaphorura glebata	187683	8952707287	17	5.2663e+08	81.2	79	76.4	9.1	11.9	37.56	125574	229419	343173347	7214	2985	11670	30269	29.3	1.19	1.06	0	0.54	25.34	1.17	0.00783	0.00782	0.00784	1450	NA	31	Gr-Col-00785	59255		no	Ulrich Burkhardt	SAMN24116373	09.07.2019	Germany	Solling	Buchenwald	51.7614	9.57807	128	0.651641
Collembola	Hypogastruridae	Ceratophysella stachi	1218962	9049743552	36	2.51382e+08	80.1	78.3	77.4	9.4	12.3	38.72	131256	91823	213097130	4727	1719	11030	29687	15.44	0.47	0.32	0	0.34	13.16	1.15	0.00772	0.0077	0.00773	1800	NA	21;31;32;41	Gr-Col-00638	49080		no	Ulrich Burkhardt	SAMN25040758	16.10.2013	Germany	Mueritz National Park	Neustrelitz, Praelank	53.3676	12.9844	133	0.847703
Collembola	Dicyrtomidae	Dicyrtomina minuta	1387116	9976547547	18	5.54253e+08	79.9	77.3	76.8	9.3	13.4	34.94	193212	163780	447895642	5332	2373	20361	52081	29.5	1.49	1.59	0	0.79	23.45	2.18	0.011	0.011	0.011	1600	sexual	14;21;23;31;32;33;41;42;51	Gr-Col-00636	49080		no	Ulrich Burkhardt	SAMN25040774	16.10.2013	Germany	Mueritz National Park	Neustrelitz, Praelank	53.3676	12.9844	126	0.808107
Collembola	Isotomidae	Folsomia inoculata	2041942	9788795007	60	1.63147e+08	79.6	77.2	76.5	9.9	12.9	39.66	159324	71697	171517891	2764	842	13907	42124	6.09	0.2	0.25	0	0.25	4.41	0.98	0.0149	0.0149	0.0151	1400	NA	21;23;31;32;42	Gr-Col-00642	52192		no	Ulrich Burkhardt	SAMN25040790	30.11.2014	Germany	Ostritz	Neißetal	50.9707	14.9027	134	1.05131
Collembola	Bourletiellidae	Bourletiella hortensis	574228	9539353584	42	2.27127e+08	79.5	75.6	74.8	9.4	15	39.38	137312	106713	220378420	3465	1448	15755	40355	16.5	0.47	0.32	0	0.68	13.56	1.47	0.0154	0.0153	0.0154	1250	sexual	12;13;14;21;22;23;31;32;33;51	Gr-Col-00811	62245		no	Ulrich Burkhardt	SAMN24116333	03.06.2014	Germany	Upper Lusatian Heath and Pond Landscape	Kreba-Neudorf	51.3339	14.7001	121	0.970285
Collembola	Dicyrtomidae	Dicyrtomina saundersi	438492	9403164683	17	5.53127e+08	79.1	75.3	74.3	11.4	13.3	34.74	209043	201186	458304002	4227	2044	27731	66788	30.24	1.42	1.49	0	0.92	24.21	2.2	0.0134	0.0134	0.0134	2800	sexual	12;23;31;32	Gr-Col-00655	59314		no	Ulrich Burkhardt	SAMN25040775	18.07.2019	Germany	Chorin, Joachimsthal	Taleinschnitt Werbellin-Kanal, bei Jaegerberg	52.9593	13.7498	127	0.828569
Collembola	Isotomidae	Isotomurus graminis	1184803	9692335572	65	149112855	78.2	72	71.5	11.4	16.6	42.08	134490	124569	162955434	6256	1254	5831	19648	5.54	0.14	0.35	0	0.37	4.04	0.64	0.0124	0.0123	0.0124	2000	NA	12;14;21;23;31;41;51	Gr-Col-00640	49016		no	Ulrich Burkhardt	SAMN25040818	02.10.2013	Germany	Goerlitz	Neißeaue	51.1279	14.9943	123	1.09283
Collembola	Neelidae	Neelides folsomi	332381	7804394744	97	8.04577e+07	77.5	74.7	74.3	2.5	22.8	33.43	4801	780296	78372643	149788	69630	142	333	4.75	0.48	0.05	0	0.11	1.49	2.62	0.000686	0.00068	0.000692	NA	parthenogenetic	NA	MI_445	DE.004.CS		no	Clément Schneider	SAMN25040855	NA	Germany	NA	NA	50.992	14.9121	122	0.974085
Collembola	Isotomidae	Isotoma caerulea	308473	9639013349	39	2.47154e+08	77.5	72.2	71.5	12.9	14.9	33.26	148477	147393	222178485	2907	1238	18345	47796	11.65	0.34	0.35	0	0.35	9.11	1.5	0.0122	0.0122	0.0122	2500	sexual	13;14;21;23;31;32;33;51	Gr-Col-00630	62125		no	Ulrich Burkhardt	SAMN25040814	22.04.2012	Germany	Goerlitz	Weinhuebel Ost. Neißeufer	51.1184	14.9913	123	0.898947
Collembola	Onychiuridae	Hymenaphorura dentifera	NA	9251268573	NA	NA	77.4	72.1	71.2	11.9	16	39.49	103881	82478	180496324	4711	1750	8511	24414	11.56	0.23	0.35	0.01	0.27	9.34	1.36	NA	0.00836	0.00873	900	NA	NA	Gr-Col-00782	62173		no	Ulrich Burkhardt	SAMN24116370	24.06.2020	Germany	Harz	Braunlage, Waldgaststaette \Rinderstall\""	51.7161	10.5635	123	NA
Collembola	Orchesellidae	Orchesella bifasciata	576794	9827010718	35	2.80772e+08	77.4	70.6	67.4	12.9	16.5	36.97	95743	348138	241293085	7143	2580	7509	21846	8.76	0.36	0.32	0	0.33	6.93	0.82	0.0115	0.0112	0.0115	2500	sexual	23;31;32;33;41;51	Gr-Col-00633	49080		no	Ulrich Burkhardt	SAMN25040862	16.10.2013	Germany	Mueritz National Park	Neustrelitz, Praelank	53.3676	12.9844	125	0.859392
Collembola	Isotomidae	Folsomia fimetaria	1387114	11209101459	70	1.6013e+08	76.8	72.1	71.6	13.7	14.2	36.56	98401	238672	152889351	3566	1315	7989	25985	5.38	0.32	0.38	0	0.42	2.51	1.75	0.0106	0.0106	0.0106	1400	NA	13;21;23;31;32;33;41;42	Gr-Col-00827		ECT, Zucht 7	yes	Ulrich Burkhardt	SAMN25040789	Before 2013	Denmark	Jutland	NA	55.45	9.08333	126	0.954783
Collembola	Isotomidae	Isotoma viridis	187635	6121635511	14	4.3726e+08	75.8	74.7	74.2	12.3	13	32.36	86700	65815	211162773	5959	2568	9539	22910	6.64	0.21	0.34	0	0.41	3.72	1.96	0.0116	0.0116	0.0116	4000	parthenogenetic	11;12;13;14;21;23;31;32;33;41;42;51	Gr-Col-00654	AEG 43 Kempson		no	Ulrich Burkhardt	SAMN25040816	30.03.2019	Germany	Goerlitz	Small city centre non-domestic gardens	NA	NA	123	0.482923
Collembola	Hypogastruridae	Ceratophysella denticulata	928250	3026816442	10	3.02682e+08	75.7	75.1	74.2	11.8	13.1	42.54	238011	71175	231752748	4342	651	11605	43811	10.12	0.3	0.46	0	0.39	8.13	0.84	0.00829	0.00828	0.00831	1800	NA	13;21;23;31;32;33;41;51	Gr-Col-00104		ECT, Zucht 4	yes	Ulrich Burkhardt	SAMN25040757	Before 2013	Sweden	Skåne	NA	57.4333	12.6167	119	0.765665
Collembola	Odontellidae	Xenyllodes armatus	187716	8084385987	NA	NA	75.3	71	70.2	13.2	15.8	38.4	106755	42160	137324662	3145	1319	11828	28455	6.61	0.17	0.52	0	0.29	4.39	1.24	NA	0.0096	0.00964	1000	NA	21;23;31;32;33;41;42;51	Gr-Col-00786	62175		no	Ulrich Burkhardt	SAMN24116374	24.06.2020	Germany	Harz	Ilsenburg	51.8829	10.6462	120	NA
Collembola	Onychiuridae	Protaphorura tricampata	187683	3376827415	10	3.37683e+08	74.4	74	73.1	11.7	14.3	36.76	95829	116667	219721032	4387	1992	12222	31007	12.61	0.25	0.4	0	0.41	10.19	1.36	0.0166	0.0166	0.0166	1800	sexual	21;23;31;33	Gr-Col-00134		ECT, Zucht 3	yes	Ulrich Burkhardt	SAMN25040890	Before 2013	Germany	NA	NA	NA	NA	126	0.650673
Collembola	Entomobryidae	Entomobrya nicoleti	2041941	9852860326	31	3.17834e+08	73	69.6	68.4	15.9	14.5	34.41	138882	130324	301443302	5915	2044	11505	33531	9.93	0.23	0.41	0	0.59	7.19	1.51	0.012	0.012	0.0121	1500	sexual	21;23;31;32;33;41;42	Gr-Col-00652	59324		no	Ulrich Burkhardt	SAMN25040785	12.05.2019	Germany	Rothenburg / Oberlausitz	Tormersdorf	51.3317	14.99	123	0.948429
Collembola	Tullbergiidae	Mesaphorura macrochaeta	2651973	7987468929	NA	NA	72.8	68.2	66.8	15.4	16.4	44.71	116492	36617	167009672	2844	1462	17435	37679	5.93	0.15	0.18	0	0.25	3.75	1.6	NA	0.0181	0.0182	550	NA	11;21;23;31;32;33;41;42	Gr-Col-00792	62171		no	Ulrich Burkhardt	SAMN24116379	24.06.2020	Germany	Harz	Ilsenburg	51.8829	10.6462	121	NA
Collembola	Onychiuridae	Protaphorura quadriocellata	187683	9940836892	20	4.97042e+08	72.3	71.6	70.2	12.6	15.8	37.39	191047	123117	367343520	4084	1792	21496	55657	30.79	1.26	1.21	0.01	1.02	26.17	1.12	0.0124	0.0124	0.0124	2200	sexual	21;23;31;32;33	Gr-Col-00665	62106		no	Ulrich Burkhardt	SAMN25040889	13.03.2020	Germany	Idstein	Eichenwald	50.2149	8.29975	124	0.73906
Collembola	Hypogastruridae	Hypogastrura burkilli	1725397	10155251965	33	307734908	71.7	70.8	70.3	11.2	18	40.73	96313	249384	207223488	5290	2222	8987	24183	32.12	1.65	0.69	0	0.65	28.24	0.89	0.0106	0.0106	0.0106	2800	NA	14;23;31;32;33	Gr-Col-00674	49112		no	Ulrich Burkhardt	SAMN25040812	30.09.2013	Germany	Aachen	Campus, Gaestehausregion Melatener 2	50.7759	6.06921	122	0.673383
Collembola	Isotomidae	Isotomurus maculatus	36143	9805038113	55	1.78273e+08	71	65.5	64.8	14.7	19.8	39.25	79358	232738	161689580	5070	1878	7065	20307	9.52	0.24	0.55	0	0.97	6.97	0.79	0.0138	0.0137	0.0138	3000	sexual	12;14;21;31;32	Gr-Col-00673	49109		no	Ulrich Burkhardt	SAMN25040819	29.09.2013	Germany	Aachen	Campus, Gaestehausregion Melatener 1. Kahlerde	50.7763	6.06759	118	0.906975
Collembola	Neanuridae	Friesea truncata	187628	10324073093	NA	NA	70.8	70	69.1	13.4	16.6	33.78	71552	122928	100861041	3995	1266	4790	16389	11.54	0.33	0.51	0	0.19	8.56	1.95	NA	0.0115	0.0116	700	sexual	12;13;21;23;31;32;33;41;51	Gr-Col-00784	62173		no	Ulrich Burkhardt	SAMN24116372	24.06.2020	Germany	Harz	Braunlage, Waldgaststaette \Rinderstall\""	51.7161	10.5635	116	NA
Collembola	Bourletiellidae	Deuterosminthurus bicinctus f. flava	2041938	11074524694	55	2.01355e+08	70.7	66.5	65.7	14.6	18.9	41.1	98953	262799	199288932	6405	2270	6666	19743	16.95	0.71	0.22	0	0.73	14.04	1.25	0.0142	0.0142	0.0142	800	sexual	21;23;31;32;41	Gr-Col-00836	CS.336		no	Clément Schneider	SAMN25040772	07.07.2019	Germany	Hesse	Koenigstein im Taunus	50.1815	8.4597	118	0.989739
Collembola	Entomobryidae	Lepidocyrtus paradoxus	49179	9862875447	53	1.86092e+08	69.5	66.7	65.8	15.5	17.8	37.43	112266	261192	190194151	3409	1297	8659	32168	5.83	0.25	0.16	0	0.44	3.91	1.07	0.0118	0.0117	0.0118	3000	NA	14;21;22;23;31;32;33;41;51	Gr-Col-00631	49090		no	Ulrich Burkhardt	SAMN25040829	15.10.2013	Germany	Neustrelitz	Sandberg, Maehweide	53.37	13.0587	117	1.02204
Collembola	Entomobryidae	Entomobrya nivalis	1387109	13010077248	40	3.25252e+08	69.2	65.7	64.2	16.1	18.2	34.47	138560	128347	301116343	6069	2104	11206	32693	9.94	0.17	0.48	0	0.42	7.49	1.38	0.0122	0.0122	0.0122	2000	both	12;14;21;23;31;32;33;41;42;51	Gr-Col-00795	62172		no	Ulrich Burkhardt	SAMN25040786	24.06.2020	Germany	Harz	Eckertal	51.884	10.6445	119	0.925794
Collembola	Isotomidae	Isotoma anglicana	247611	9748460180	38	2.56538e+08	68.5	66.1	65.6	16.6	17.3	33.25	187310	136347	228664101	2196	959	26020	65629	11.95	0.3	0.28	0	0.38	9.41	1.58	0.0137	0.0137	0.0137	3400	sexual	13;21;22;23;31;32;33;41;42;51	Gr-Col-00814	62239		no	Ulrich Burkhardt	SAMN24116336	29.07.2012	Switzerland	Graubuenden	Ospizio Bernina, Lago Bianco, Westufer	46.4089	10.0073	124	0.891344
Collembola	Isotomidae	Desoria trispinata	1184801	8480068049	55	1.54183e+08	68.3	60.9	60.8	17.2	21.9	36.76	322112	224064	194342605	1016	307	33526	134554	7.4	0.43	1.33	0.12	0.87	2.8	1.85	0.0142	0.0141	0.0142	NA	sexual	13;21;23;32	Gr-Col-00313	59118		no	Ulrich Burkhardt	SAMN25040771	30.10.2018	Germany	Goerlitz	Loenscher Grund	51.1328	14.9628	119	1.26047
Collembola	Hypogastruridae	Ceratophysella sigillata	1218965	9151200470	45	2.0336e+08	66.7	66.3	65.3	17.3	16.4	38.99	156469	157959	198528694	2282	952	16656	51089	13.24	0.53	0.35	0	0.16	11.14	1.06	0.0135	0.0135	0.0135	1300	NA	21;23;31;32	Gr-Col-00773	62124		no	Ulrich Burkhardt	SAMN24116363	29.03.2013	Germany	Bad Ditzenbach	Eichbuehl	48.5647	9.72247	116	0.976243
Collembola	Isotomidae	Vertagopus arboreus	2041954	10509192443	49	2.14473e+08	64.4	62	61.3	21	17	33.74	147208	159467	195948357	2716	1062	15178	44504	14.76	0.49	0.68	0	0.36	11.83	1.4	0.0133	0.0132	0.0133	1700	sexual	23;31;32;33;42	Gr-Col-00647	59294		no	Ulrich Burkhardt	SAMN25040918	17.11.2019	Germany	Koenigswinter	Park der Drachenburg	50.6682	7.2082	103	0.913626
Collembola	Isotomidae	Folsomia penicula	266765	1020486558	5	2.04097e+08	64	58.8	58.7	17.4	23.8	39.32	82979	33253	122276944	2595	1351	13543	29784	5.92	0.22	0.14	0	0.19	3.35	2.02	0.0217	0.0216	0.0217	1600	NA	21;23;31;32;33;41	Metainvert_48	59093		no	NA	SAMN24116380	16.01.2018	Germany	Bautzen, Wartha	Olbasee, Graben	51.2718	14.6102	107	0.599111
Collembola	Tomoceridae	Tomocerus minor	187706	2322727961	6	3.87121e+08	63.4	57.6	56.9	20.1	22.3	35.03	165477	71518	223297057	2935	1033	15470	49249	6.41	0.1	0.18	0	0.27	4.98	0.88	0.00583	0.00582	0.00584	4000	sexual	12;13;14;21;23;31;32;33;41;42;51	Gr-Col-00146	59118		no	Ulrich Burkhardt	SAMN25040914	30.10.2018	Germany	Goerlitz	Loenscher Grund	51.1328	14.9628	110	0.576814
Collembola	Katiannidae	Sminthurinus elegans	1190784	8138923407	22	369951064	63.2	66.4	65.9	20.3	13.3	33.23	228649	103258	316414809	2385	1151	34555	82288	19.87	0.41	0.31	0	0.27	12.97	5.91	0.021	0.021	0.021	700	sexual	11;12;14;21;23;31;32;33;41;42	P4_20	CS332		no	Clément Schneider	SAMN25040902	NA	NA	NA	NA	NA	NA	122	0.855288
Collembola	Entomobryidae	Lepidocyrtus lignorum	707889	8544094945	32	267002967	63.1	58.7	58	23.1	18.2	37.5	244434	88764	254554235	1925	817	31241	82199	10.26	0.21	0.4	0	0.27	8.18	1.2	0.0178	0.0177	0.0178	NA	sexual	21;22;23;31;32;33;41;42	Gr-Col-00319	59118		no	Juergen Schulz	SAMN25040828	30.10.2018	Germany	Goerlitz	Loenscher Grund	51.1328	14.9628	113	0.953376
Collembola	Hypogastruridae	Ceratophysella scotica	187617	10142638447	36	2.8174e+08	62.8	62.3	60.8	19.6	18.1	38.82	188343	132607	259081466	2670	1170	22876	59992	24.3	1.1	0.36	0.01	0.38	21.52	0.93	0.0127	0.0127	0.0127	1350	NA	23;31;32;41	Gr-Col-00776	61231		no	Ulrich Burkhardt	SAMN24116364	17.03.2019	Germany	Niesky	Sachsenberg	51.2776	14.8645	115	0.919577
Collembola	Entomobryidae	Lepidocyrtus cyaneus	247612	9062738693	35	2.58935e+08	62.7	58.5	57.3	22.1	19.4	39.13	236444	77166	246502610	1889	786	29846	80955	6.57	0.16	0.27	0	0.29	4.14	1.71	0.016	0.016	0.016	1500	NA	12;13;14;21;23;31;32;33;41;42;51	Gr-Col-00657	62492		no	Ulrich Burkhardt	SAMN25040827	23.02.2020	Germany	Ostritz Klosterwald	Heidrichstein	51.009	14.8943	110	0.951985
Collembola	Isotomidae	Desoria olivacea	370026	9330536079	53	1.76048e+08	62	55.4	54.4	21.3	23.3	37.55	129205	314855	177463277	2562	1073	14240	41385	7.9	0.23	0.35	0	0.49	5.87	0.96	0.0151	0.0151	0.0151	2100	sexual	23;31;41;51	Gr-Col-00796	62248		no	Ulrich Burkhardt	SAMN25040770	30.04.2013	Germany	Harz, Brocken	Torfhaus	51.792	10.5619	112	1.00804
Collembola	Isotomidae	Isotoma decorata	57735	9762108587	35	2.78917e+08	60.1	56.8	55.6	21.3	21.9	33.99	161334	203684	263569971	3168	1317	18079	50749	16.66	0.67	0.68	0	0.7	12.28	2.33	0.0191	0.0191	0.0191	3400	sexual	NA	Gr-Col-00675	62319		no	Ulrich Burkhardt	SAMN25040815	05.05.2015	Israel	Tel Aviv-Jaffa	Yarkon River	32.0966	34.7836	99	0.944975
Collembola	Entomobryidae	Pseudosinella alba	1302326	8896844476	27	3.29513e+08	59.9	57.2	56.4	22.9	19.9	39.17	229238	280691	290112910	2675	1039	22339	66287	7.25	0.13	0.17	0	0.3	4.77	1.88	0.0204	0.0204	0.0204	1100	NA	12;13;14;21;23;31;32;33;41;42	Gr-Col-00645	62493		no	Ulrich Burkhardt	SAMN25040892	23.02.2020	Germany	Hirschfelde	Neißetal	50.9555	14.8964	100	0.88043
Collembola	Isotomidae	Isotomiella paraminor	370031	8866284373	NA	NA	58.1	57.5	57	22.5	20	40.83	113421	100623	142538560	2263	986	14710	38911	4.68	0.18	0.23	0	0.23	2.82	1.22	NA	0.0162	0.0163	NA	NA	23;31;32;41	Gr-Col-00781	59262		no	Ulrich Burkhardt	SAMN24116369	09.07.2019	Germany	Esslingen	Fichtenforst	48.7579	9.42997	101	NA
Collembola	Isotomidae	Isotomurus plumosus	1410395	1712378587	10	1.71238e+08	57.8	53	52.9	20.4	26.6	38.85	116580	83885	122521952	1797	890	18426	42564	3.8	0.14	0.18	0.01	0.49	2.18	0.8	0.00846	0.00844	0.00849	2500	sexual	21;23;31;32;33;41;42;51	Gr-Col-00116	59125		no	Ulrich Burkhardt	SAMN25040821	30.10.2018	Germany	Zittau, Schlegel	Teichgebiet	50.9811	14.8393	112	0.715507
Collembola	Neanuridae	Bilobella braunerae	106916	8795148204	30	2.93172e+08	57	57.3	56.4	21	21.7	36.35	133070	179693	272459232	4663	1882	14555	37684	30.16	0.52	0.87	0.05	0.71	26.59	1.42	0.0144	0.0144	0.0144	2100	sexual	31	Gr-Col-00646	59314		no	Ulrich Burkhardt	SAMN25040752	18.07.2019	Germany	Chorin, Joachimsthal	Taleinschnitt Werbellin-Kanal, bei Jaegerberg	52.9593	13.7498	101	0.929351
Collembola	Entomobryidae	Entomobrya muscorum	2041940	2559153719	4	6.39788e+08	55.9	53.4	53	22.4	24.2	35.31	169420	63066	281852611	2944	1449	26768	60742	11.37	0.19	0.5	0	0.34	8.91	1.43	0.0115	0.0115	0.0115	1500	sexual	14;23;31;32;33;41;51	Gr-Col-00637	49080		no	Ulrich Burkhardt	SAMN25040784	16.10.2013	Germany	Mueritz National Park	Neustrelitz, Praelank	53.3676	12.9844	103	0.44054
Collembola	Orchesellidae	Orchesella cincta	48709	13903392648	50	278067853	52.4	52.7	49.1	22.7	24.6	36.51	176912	102181	313548031	4123	1356	15785	50870	15.92	0.59	0.59	0	0.62	13.28	0.84	0.0241	0.0241	0.0241	3000	NA	12;13;14;21;22;23;31;32;33;41;42;51	Gr-Col-00777	59327		no	Ulrich Burkhardt	SAMN24116365	16.05.2019	Germany	Oberhausen	Welchenhausen	50.1581	6.14289	91	1.1276
Collembola	Onychiuridae	Protaphorura armata	187684	9581890774	35	2.73768e+08	47.9	44.7	43	30.2	25.1	37.34	219578	149262	296591475	2687	1090	25519	69329	18.77	0.51	0.52	0	0.34	15.96	1.44	0.0201	0.02	0.0201	1800	sexual	13;21;23;31;32;33;41;51	Gr-Col-00666	59093		no	Ulrich Burkhardt	SAMN25040887	16.01.2018	Germany	Bautzen, Wartha	Olbasee, Graben	51.2718	14.6102	86	1.08337
Collembola	Arrhopalitidae	Pygmarrhopalites spinosus	187608	9282639871	25	3.71306e+08	46.8	39	38.9	25.9	35.1	35	230570	52339	316647704	2352	1143	36840	85039	25.61	1.17	0.36	0	0.51	21.62	1.95	0.021	0.021	0.021	500	parthenogenetic	NA	Gr-Col-00791	59263		no	Ulrich Burkhardt	SAMN24116378	15.07.2019	Germany	Heidelberg	Fichtenforst	49.4677	8.74336	89	0.852795
Collembola	Neelidae	Neelus murinus	1348065	8422189407	40	2.10555e+08	44.2	43.6	41.2	30.3	26.1	26.44	152938	36343	215749963	2734	1149	20248	50974	21.23	1.6	0.71	0	0.29	11.08	7.55	0.0191	0.0191	0.0191	800	NA	21;23;31;33	MI_451	Fontanguillere01		no	Clément Schneider	SAMN25040856	NA	France	NA	NA	44.7684	0.436642	78	1.02467
Collembola	Neanuridae	Anurida granulata	187659	9596399875	NA	NA	44.1	41.2	40.6	33.3	25.5	40.37	122445	31522	133098490	1852	872	19371	45474	9.94	0.35	0.45	0	0.2	7.66	1.28	NA	0.0311	0.0311	NA	NA	31;32	Gr-Col-00783	62173		no	Ulrich Burkhardt	SAMN24116371	24.06.2020	Germany	Harz	Braunlage, Waldgaststaette \Rinderstall\""	51.7161	10.5635	83	NA
Collembola	Isotomidae	Isotomurus unifasciatus	48718	6755173706	6	1125862284	43.6	37.3	37.2	24.9	37.8	40.02	436469	48488	260278615	693	353	61082	202210	17.72	0.22	0.49	0.32	0.73	15.02	0.94	0.0102	0.0102	0.0102	2700	sexual	21;23;31;32;51	Gr-Col-00121	59125		no	Ulrich Burkhardt	SAMN25040823	30.10.2018	Germany	Zittau, Schlegel	Teichgebiet	50.9811	14.8393	80	0.231182
Collembola	Tullbergiidae	Paratullbergia callipygos	2041961	9308624438	NA	NA	36.8	35.1	33.8	29.5	35.4	40.93	175394	35444	184247582	2185	877	23386	55858	7.45	0.52	0.71	0	0.39	3.29	2.54	NA	0.0408	0.0408	850	both	21;23;31;32;42	Gr-Col-00662	62104		no	Ulrich Burkhardt	SAMN25040870	13.03.2020	Germany	Idstein	Buchenwald	50.2157	8.30275	58	NA
Collembola	Entomobryidae	Sinella curviseta	187695	2164897550	4	5.41224e+08	19.7	19.5	19.4	35.7	44.8	36.76	342530	32228	270854554	1010	606	82926	169245	6.11	0.15	0.28	0	0.28	4.04	1.36	0.00791	0.0079	0.00793	2000	sexual	41	Gr-Col-00137		ECT, Zucht 8	yes	Ulrich Burkhardt	SAMN25040899	Before 2013	United States	USA	NA	NA	NA	49	0.500448
Collembola	Onychiuridae	Supraphorura furcifera	2041972	7916066769	NA	NA	17.5	12.7	12.6	25.6	61.7	36.21	269428	21454	197817911	987	549	59811	126950	9.36	0.23	0.25	0	0.2	7.54	1.14	NA	0.01	0.01	1400	NA	21;23;31;32;33	Gr-Col-00780	62173		no	Ulrich Burkhardt	SAMN24116368	24.06.2020	Germany	Harz	Braunlage, Waldgaststaette \Rinderstall\""	51.7161	10.5635	26	NA
Collembola	Onychiuridae	Protaphorura fimata	1519113	1016145313	3	3.38715e+08	10.8	9	8.9	20.8	70.2	36.35	199292	30218	127365758	805	457	46626	99374	6.11	0.2	0.53	0	0.4	3.73	1.25	NA	0.0141	0.0141	2500	NA	11;23;31;51	Gr-Col-00131		ECT, Zucht 9	yes	Ulrich Burkhardt	SAMN25040888	Before 2013	Germany	Harz, Goslar	NA	51.8333	10.4	28	0.376026
Diplopoda	Polydesmidae	Polydesmus complanatus	510027	9393567477	35	2.68388e+08	83.1	83.6	82.7	3.1	13.3	33.37	39646	271648	164742549	29682	10387	1441	3791	14.76	0.74	0.42	0	1.03	9.34	3.23	0.00597	0.00597	0.00615	19000	sexual	23;31;32;41	Gr-Myr-00691	61908		no	Peter Decker	SAMN25040881	19.10.2019	Germany	Schorfheide Chorin, Joachimsthal	Poratz Morainic landscape, NSG Hechtdiebel bog	53.0454	13.8137	125	0.613823
Diplopoda	Julidae	Xestoiulus laeticollis	1522044	9237316105	22	4.19878e+08	72	73.9	73.6	7.9	18.2	36.49	77199	146134	253874087	10233	4525	6432	15793	31.3	2.04	1.01	0.14	3.01	24.04	1.06	0.00604	0.00603	0.00605	12500	sexual	14;31;41	Gr-Myr-00688	57986		no	Peter Decker	SAMN25040922	25.05.2018	Germany	Brandenburg	Sernitzmoor	53.0827	13.9199	123	0.604638
Diplopoda	Julidae	Kryphioiulus occultus	1008825	9576459548	15	6.38431e+08	69.4	72.3	71.9	7.7	20	37.63	33207	199451	229089770	18320	8093	3264	7979	28.75	2.66	0.71	0.14	0.99	22.76	1.49	0.0117	0.0117	0.0117	11000	sexual	14;23;31	Gr-Myr-00714	VNR 017031-1		no	Peter Decker	SAMN25040826	13.06.2015	Germany	Mueritz National Park	Neustrelitz, Roggentin, Babke, Camp Carolinum	53.3592	12.8897	114	0.358833
Diplopoda	Julidae	Rossiulus vilnensis	2926741	9761249581	9	1084583287	70.9	71.6	71.4	6.1	22.3	37.4	22242	129385	210650099	19056	9771	3180	7005	19.29	1.55	0.96	0.01	1.63	13.91	1.23	0.00555	0.00536	0.00555	28000	sexual	31;32;41	Gr-Myr-00719	64069		no	Peter Decker	SAMN25040895	2011	Germany	Dubringer Moor	NA	51.3939	14.1484	113	0.194222
Diplopoda	Polydesmidae	Polydesmus angustus	1068628	9476180982	37	2.56113e+08	75.5	71.8	71.2	11	17.2	31.77	111608	189020	198627508	4058	1556	10219	30420	19.64	1.65	0.23	0.03	0.43	14.59	2.71	0.0104	0.0104	0.0104	18500	sexual	12;14;23;31;32;33	Gr-Myr-00678	64067		no	Peter Decker	SAMN25040880	06.06.2020	Germany	Goerlitz, Viadukt, Neiße	Viadukt, Neiße	51.1435	14.9902	116	0.775546
Diplopoda	Julidae	Julus scanicus	541046	10030948295	23	4.36128e+08	73.5	71.6	71.1	4.9	23.5	36.52	52602	205375	250717246	12188	5656	5328	12913	33.13	4.17	1.72	0.45	4.2	21	1.59	0.00506	0.00505	0.00507	18000	sexual	23;31	Gr-Myr-00721	VNR 016638-2		no	Peter Decker	SAMN25040825	13.06.2014	Germany	Mueritz National Park	Babke, Camp Carolinum	53.3592	12.8897	118	0.574871
Diplopoda	Julidae	Megaphyllum sjaelandicum	52423	12580691221	24	5.24195e+08	71.5	70.4	70	10.6	19	37.11	69978	125190	332940831	9845	4826	9325	21413	35.73	4.6	1.46	0.04	6.68	21.26	1.69	0.0134	0.0134	0.0134	19000	sexual	31;41	Gr-Myr-00800	63555		no	Peter Decker	SAMN25040844	02.05.2016	Estonia	Tartu	Peetri kalmistu paljandi juurest (Peetri-Friedhof)	58.3948	26.7105	122	0.635146
Diplopoda	Blaniulidae	Proteroiulus fuscus	88024	9614931243	22	4.37042e+08	68.9	69.8	69.6	12.4	17.8	34.87	80493	90448	259036933	7358	3742	9943	22240	34.99	1.24	1.11	0.06	3.39	27.21	1.98	0.00399	0.00398	0.00399	11000	sexual	11;14;31;32;33	Gr-Myr-00696	61914		no	Peter Decker	SAMN25040891	20.10.2019	Germany	Schorfheide Chorin, Joachimsthal	Dovin Lake	53.0004	13.7904	115	0.592704
Diplopoda	Julidae	Ommatoiulus sabulosus	1008866	10854906657	15	7.2366e+08	69.8	69.4	69.2	11.9	18.7	36.89	69369	114607	334250988	9469	4591	9712	22385	35.86	6.63	1.33	0.15	3.15	22.82	1.78	0.0135	0.0135	0.0135	31000	sexual	12;23;31;32	Gr-Myr-00689	VNR 18075-3		no	Peter Decker	SAMN25040860	20.04.2016-18.05.2016	Germany	Hirschfelde	Neißetal	NA	NA	121	0.461889
Diplopoda	Chordeumatidae	Chordeuma sylvestre	1569510	9002613031	17	5.29565e+08	66.7	69.6	69	9	21.4	40.84	65680	167532	317608641	13357	5931	6247	15173	25.06	1.09	1.72	0.14	2.63	18.42	1.06	0.00529	0.00528	0.0053	15500	sexual	31;32	Gr-Myr-00803	62162		no	Peter Decker	SAMN25040763	24.06.2020	Germany	Harz	Eckertal	51.884	10.6445	111	0.599753
Diplopoda	Julidae	Julus scandinavius	1008810	9470150633	21	450959554	70.9	68.1	67.8	7	24.9	37	70023	151016	251366835	9941	4460	6627	16095	32.9	5.06	1.59	0.31	4.43	20.33	1.18	0.0078	0.00779	0.00781	26500	sexual	11;12;13;14;21;23;31;32;41	Gr-Myr-00694	61909		no	Peter Decker	SAMN25040824	19.10.2019	Germany	Schorfheide Chorin, Joachimsthal	Poratz Morainic landscape, NSG Hechtdiebel bog	53.045	13.8135	108	0.557404
Diplopoda	Glomeridae	Glomeris marginata	62006	9034697819	30	301156594	68.6	67.1	67	8.4	24.5	40.01	108880	131669	164366402	8918	2311	4292	13253	20.14	1.8	0.66	0	1.02	15.69	0.97	0.00631	0.0063	0.00633	13500	sexual	12;13;14;21;23;31;32;33	Gr-Myr-00686	61911		no	Peter Decker	SAMN25040799	19.10.2019	Germany	Schorfheide Chorin, Joachimsthal	Poratz Morainic landscape, NSG Hechtdiebel bog	53.0437	13.8118	120	0.545784
Diplopoda	Julidae	Cylindroiulus punctatus	61981	9748746741	25	3.8995e+08	69.4	67.5	66.8	8.5	24	39.57	59487	197196	212272289	11110	4432	4423	12045	24.69	1.27	0.84	0.05	1.36	20.06	1.11	0.00689	0.00688	0.0069	20500	sexual	12;14;31;32;41	Gr-Myr-00690	61911		no	Peter Decker	SAMN25040769	19.10.2019	Germany	Schorfheide Chorin, Joachimsthal	Poratz Morainic landscape, NSG Hechtdiebel bog	53.0437	13.8118	112	0.544358
Diplopoda	Chordeumatidae	Mycogona germanica	2926739	10058566664	19	5.29398e+08	64.3	67	66.7	10.4	22.6	40.86	71108	132267	320011044	12670	5709	6750	16214	25.17	1.17	1.71	0.01	2.53	18.71	1.04	0.00534	0.00533	0.00534	14500	sexual	13;23;31;32;33	Gr-Myr-00804	62163		no	Peter Decker	SAMN25040851	24.06.2020	Germany	Harz	Eckertal	51.884	10.6445	107	0.604481
Diplopoda	Glomeridae	Glomeris hexasticha	1392624	8317882942	15	5.54526e+08	66.6	66.3	66.2	11.7	22	39.09	96752	62991	208189405	4772	2256	11501	27393	34.13	3.32	1.23	0.01	2.8	25.87	0.9	0.0163	0.0163	0.0163	11500	sexual	23;31;32;33	Gr-Myr-00724	59102		no	Peter Decker	SAMN25040798	01.05.2018	Czech Republic	Cesky Dub	Teufelsmauer	50.6765	14.9472	109	0.375437
Diplopoda	Julidae	Ophyiulus pilosus	118470	9472782582	32	2.96024e+08	61.5	61.3	61.2	15.4	23.3	37.49	74730	525970	213124919	7478	2853	5231	17103	23.43	2.21	1.08	0.29	1.25	16.86	1.74	0.00737	0.00736	0.00738	20000	sexual	12;13;14;21;23;31;32	Gr-Myr-00720	VNR 017028-1		no	Peter Decker	SAMN25040861	13.06.2015	Germany	Mueritz National Park	Campingplatz Boek	53.3974	12.799	104	0.719957
Diplopoda	Chordeumatidae	Melogona broelemanni	1569492	9320200697	13	7.16939e+08	53.4	54.2	53.8	24.9	20.9	40.71	122283	66304	367236352	5998	3046	17584	39027	26.52	0.62	1.13	0.32	0.89	20.32	3.24	0.0121	0.0121	0.0121	7500	sexual	12;13;14;21;23;31;32	Gr-Myr-00723	59107		no	Peter Decker	SAMN25040845	18.05.2016	Germany	Hirschfelde	Saupantsche, Graben	50.9977	14.9118	98	0.512229
Diplopoda	Julidae	Tachypodoiulus niger	433595	10354430449	4	2588607612	38.6	37.7	36.9	32.6	29.7	36.35	342704	29294	364107125	1569	875	69487	147016	19.73	1.15	0.78	0	0.79	15.88	1.13	0.0122	0.0122	0.0123	34000	sexual	21;23;31	Gr-Myr-00802	62160		no	Peter Decker	SAMN25040910	24.06.2020	Germany	Harz	Ilsenburg	51.8829	10.6462	71	0.140658
Diplopoda	Nemasomatidae	Nemasoma varicorne	118473	9111813169	8	1138976646	35.3	33.1	31.8	33.6	33.3	35.98	340787	25089	415979079	1893	1032	66055	140260	42	2.99	4.92	0.01	1.28	31.54	1.26	0.016	0.016	0.016	9000	sexual	14;31	Gr-Myr-00772	59441		no	Peter Decker	SAMN24116362	26.04.2019	Germany	Donauwoerth	Donau/Lech - Auwald	48.7311	10.931	62	0.365222
Diplopoda	Paradoxosomatidae	Strongylosoma stigmatosum	1392627	1996876754	8	2.4961e+08	32.4	28.4	28.4	33.5	38.1	30.66	119668	27001	142203989	1618	972	26875	55197	17.17	2.11	0.4	0	0.38	12.65	1.63	0.006	0.00599	0.00602	19000	sexual	23;31;32	Gr-Myr-00090	59104		no	Peter Decker	SAMN25040908	01.05.2018	Germany	Goerlitz	Landeskrone	51.1283	14.9378	57	0.569706
Diplopoda	Blaniulidae	Choneiulus palmatus	1008849	9434792779	8	1179349097	23.8	20.8	20.8	35.4	43.8	34.09	215368	25472	330927454	2424	1362	39515	85341	47.31	1.01	2.02	0.83	0.88	41.37	1.2	0.0114	0.0114	0.0114	10000	sexual	11;12;14;21;31;32	Gr-Myr-00715	VNR 016541-1		no	Peter Decker	SAMN25040762	24.03.2014	Germany	Goerlitz	Innenstadt	51.1555	14.9822	54	0.280602
Diplopoda	Julidae	Leptoiulus proximus	1008861	3463845396	6	577307566	18.3	17.4	17.4	26.4	56.2	37.15	274124	18857	217102969	1077	611	60900	127188	20.69	2.45	1.18	0.29	1.62	14	1.15	0.0121	0.012	0.0121	25000	sexual	21;23;31;32;41	Gr-Myr-00087	59103		no	Karin Voigtlaender	SAMN25040831	01.05.2018	Poland	Sawid	Straße von Sawidow nach Goerlitz	51.0695	15.0309	35	0.376061
Diplopoda	Polyzoniidae	Polyzonium germanicum	118488	4531328952	NA	NA	68.4	4.3	4.3	0.3	95.4	44.07	250697	98439	192114716	2918	343	14294	66029	18.11	0.53	0.22	0	0.48	14.85	2.03	NA	0.0042	0.00423	11500	sexual	14;23;31;32;33;41	Gr-Myr-00096	59102		no	Karin Voigtlaender	SAMN25040882	01.05.2018	Czech Republic	Cesky Dub	Teufelsmauer	50.6765	14.9472	0	NA
Diplura	Campodeidae	Campodea plusiochaeta	89972	8913343031	9	9.90371e+08	26.4	28	27.5	39.2	32.8	30.96	263745	85230	562994612	3625	1833	41584	96407	32.46	1.23	1	0.4	1.43	26.75	1.65	0.0148	0.0148	0.0148	3000	sexual	NA	Gr-Dip-00660	62100		no	Ulrich Burkhardt	SAMN25040754	14.03.2020	Germany	Idstein	zwischen Heftrich und Schloßborn	50.2064	8.34728	59	0.568468
Diplura	Campodeidae	Campodea silvestrii	1519098	11310118394	5	2262023679	9.7	10.5	10.3	20	69.5	33.57	470867	35462	776217456	2491	1409	93260	196846	39.76	1.65	1.19	0.06	0.36	35.02	1.45	0.00802	0.00801	0.00803	3450	sexual	NA	Gr-Dip-00794	62162		no	Ulrich Burkhardt	SAMN25040755	24.06.2020	Germany	Harz	Eckertal	51.884	10.6445	19	0.343152
Enchytraeidae	Enchytraeidae	Oconnorella tubifera	913705	7775101021	18	4.3195e+08	62.2	60.1	58.7	17.8	22.1	32.39	84673	86923	270794280	8730	4022	8306	19720	25.91	1.66	2.52	0.61	0.44	16.13	4.55	0.00614	0.00612	0.00614	9000	sexual	23;31	9	BDF_Altenburg		no	Rüdiger Schmelz	SAMN25040859	12.2013	Germany	Thüringen	BDF Altenburg	NA	NA	97	0.626911
Enchytraeidae	Enchytraeidae	Cognettia cognettii	1502715	8789058773	17	5.17003e+08	58.8	57.5	56.8	12.7	29.8	42.68	116430	97882	377493589	9455	4513	11265	25587	35.26	1.69	4.84	0.96	0.4	25.84	1.53	0.00821	0.0082	0.00822	8500	sexual	31; 32; 41	15	BDF_Westerwald		no	Rüdiger Schmelz	SAMN25040764	12.2013	Germany	Thüringen	BDF Westerwald	NA	NA	88	0.730157
Enchytraeidae	Enchytraeidae	Enchytraeus crypticus	913645	18397937294	38	4.84156e+08	54.8	53	51.7	23.3	23.7	36.97	176557	77128	447737647	7855	3950	16917	36802	33.57	2.32	6.63	0.14	0.8	18.44	5.24	0.00254	0.00253	0.00254	7500	both	21	Gr-Enc-00847		ECT, Zucht 12	yes	Rüdiger Schmelz	SAMN25040780	NA	Germany	NA	NA	NA	NA	102	0.924779
Enchytraeidae	Enchytraeidae	Buchholzia appendiculata	735358	9329765787	9	1036640643	34.9	32.6	32.4	37.9	29.5	38.9	281699	37429	580164836	3436	1821	48047	106129	30.37	2.37	4.52	0	0.61	19.83	3.04	0.0188	0.0188	0.0188	7500	both	21;23;31;32;41	1	BDF_Westerwald		no	Rüdiger Schmelz	SAMN25040753	12.2013	Germany	Thüringen	BDF Westerwald	NA	NA	59	0.559659
Enchytraeidae	Enchytraeidae	Enchytraeus norvegicus	913647	7748338684	10	7.74834e+08	32	30.6	30.2	37.5	31.9	37.94	205888	38449	512898684	4472	2449	34575	73186	48.1	4.63	6.43	0.33	0.59	33.27	2.85	0.00451	0.00451	0.00452	3000	sexual	21;23;31	19	BDF_Altenburg		no	Rüdiger Schmelz	SAMN25040781	12.2013	Germany	Thüringen	BDF Altenburg	NA	NA	65	0.661947
Enchytraeidae	Enchytraeidae	Fridericia nemoralis	913654	7818497745	8	9.77312e+08	22.2	19.8	19.6	42.8	37.4	37.81	409946	39231	566291896	2101	1175	79454	169895	35.02	2.89	5.13	0.03	0.38	22.2	4.39	0.0149	0.0149	0.0149	10500	sexual	21;23;31	6	BDF_Altenburg		no	Rüdiger Schmelz	SAMN25040791	12.2013	Germany	Thüringen	BDF Altenburg	NA	NA	44	0.579438
Enchytraeidae	Enchytraeidae	Stercutus niveus	913707	9391034410	4	2347758603	9.2	7.6	7.3	31.7	60.7	39.36	675944	22332	748352129	1636	949	139401	289509	35.86	1.43	5.1	0	0.17	27.02	2.14	0.0209	0.0209	0.0209	4500	sexual	31	11	BDF_Juechsen		no	Rüdiger Schmelz	SAMN25040906	10.2015	Germany	Thüringen	BDF Juechsen	NA	NA	16	0.318752
Gamasina	Laelapidae	Stratiolaelaps miles	224784	6458055465	10	6.45806e+08	82.5	83.4	82.2	6	10.6	46.28	99663	125886	417071353	13034	6195	8611	20189	13.05	1.64	2.8	0	0.52	5.32	2.77	0.000996	0.000992	0.000999	585	sexual	31	Gr-Gam-00760	62158		yes	Axel Christian	SAMN24116356	03.07.2020	Germany	Tuebingen	Ammerbruch	48.56	8.97	130	0.645816
Gamasina	Parasitidae	Pergamasus crassipes	2234139	8066564395	4	2016641099	40.4	44.1	43.9	26.6	29.3	41.24	484153	32602	450915229	1493	743	85141	190540	33.15	2.66	8.66	0	1.23	19.69	0.91	0.0236	0.0236	0.0237	NA	NA	NA	Gr-Gam-00754	59118		no	Axel Christian	SAMN24116353	30.10.2018	Germany	Goerlitz	Loenscher Grund	51.1328	14.9628	78	0.223597
Gamasina	Zerconidae	Zercon vagabundus	118551	9103848963	8	1137981120	19.3	24.8	24.3	25.4	49.8	38.86	537921	28592	469109591	1236	684	112896	238629	44.64	1.42	0.8	0	0.41	40.56	1.45	0.0112	0.0111	0.0112	415	sexual	31	Gr-Gam-00762	59110		no	Axel Christian	SAMN24116357	04.07.2018	Germany	Rhein	Raststatt	48.8743	8.13935	45	0.41223
Gamasina	Epicriidae	Epicrius mollis	717519	8601777431	6	1433629572	10.4	9.2	9.2	16.8	74	37.6	393830	22815	214654707	619	364	89448	205054	30.96	1.14	1.69	0	1.98	24.69	1.46	0.0134	0.0133	0.0134	550	sexual	31	Gr-Gam-00756	59119		no	Axel Christian	SAMN24116354	30.10.2018	Germany	Goerlitz	Loenscher Grund	51.1326	14.9629	24	0.149728
Isopoda	Trichoniscidae	Haplophthalmus danicus	115156	6101531921	NA	NA	16.7	16.9	16.7	26.7	56.4	35.14	576956	25449	342827662	813	376	108379	268315	25.21	2.58	7.58	0.1	1.03	10.26	3.66	NA	0.011	0.0111	4000	sexual	11;12;31;41	Gr-Myr-00799	62159		no	Peter Decker	SAMN25040803	24.06.2020	Germany	Harz	Ilsenburg	51.8829	10.6462	43	NA
Isopoda	Porcellionidae	Porcellio scaber	64697	9794121754	4	2448530439	9.9	9.2	9.2	11.2	79.6	32.1	456694	19630	397704848	1244	656	92197	200928	47.28	4.87	16.32	0.09	1.9	19.62	4.48	0.0151	0.015	0.0151	15000	sexual	21;31;32;41	Gr-Myr-00683	64067		no	Peter Decker	SAMN25040883	06.06.2020	Germany	Goerlitz, Viadukt, Neiße	Viadukt, Neiße	51.1435	14.9902	18	0.162426
Isopoda	Trichoniscidae	Trichoniscus pusillus	33330	7761233813	NA	NA	3.1	3.3	3.2	11.2	85.5	30.79	524954	21120	275343404	603	364	129839	278589	31.54	2.57	6.64	0.04	1.45	17.56	3.28	NA	0.0331	0.0332	4000	both	31;41	Gr-Myr-00684	64067		no	Peter Decker	SAMN25040915	06.06.2020	Germany	Goerlitz, Viadukt, Neiße	Viadukt, Neiße	51.1435	14.9902	8	NA
Lumbricina	Lumbricidae	Dendrobaena attemsi	565147	8289926303	9	9.21103e+08	29.9	26.6	26.3	33.5	39.9	41.08	344904	43798	624851678	3825	1851	45669	104332	39.51	2.07	4.92	0	0.28	28.9	3.34	0.0133	0.0133	0.0133	48000	sexual	21;31	Gr-Lum-00770	62170		no	Karin Voigtlaender	SAMN24116361	24.06.2020	Germany	Harz	Braunlage, Waldgaststaette \Rinderstall\""	51.7161	10.5635	51	0.678373
Nematoda	Aphelenchidae	Aphelenchus avenae	70226	3508242108	20	1.75412e+08	59.6	59.4	58.4	6	34.6	49.51	65843	90511	173176268	5045	2555	9262	21324	15.96	0.45	0.37	0	0.54	13.63	0.97	0.0183	0.0182	0.0183	500	parthenogenetic	14;21;24;31;32;41	Gr-Nem-00016	SMNG_Nem_2636-2652	Koenig-18	yes	Karin Hohberg	SAMN25040750	NA	Germany	NA	NA	NA	NA	115	0.987254
Nematoda	Cephalobidae	Acrobeloides thornei	96599	11067404909	NA	NA	60.5	60	58.6	10.2	29.8	36.07	102479	54034	218913954	4301	2051	14096	32526	46.04	2.19	0.16	0.06	0.2	42	1.43	NA	0.0308	0.0309	420	parthenogenetic	33;41	Gr-Nem-00859	SMNG_Nem_2666-2675	Koenig-17	yes	Karin Hohberg	SAMN25040742	NA	Germany	NA	NA	NA	NA	126	NA
Nematoda	Cephalobidae	Acrobeloides obliquus	70201	12010746063	75	1.60143e+08	42.9	39.4	34.3	23.3	37.3	35.33	93701	52633	235410550	6403	3164	10663	23595	47.33	2.08	0.14	0.03	0.79	42.72	1.57	0.0142	0.0141	0.0142	500	parthenogenetic	33;41	Gr-Nem-00861	SMNG_Nem_2685-2694	Koenig-17	yes	Karin Hohberg	SAMN25040741	NA	Germany	NA	NA	NA	NA	67	1.47
Nematoda	Cephalobidae	Acrobeloides cf. buchneri	2072754	9493739321	NA	NA	33.5	33.5	33.1	25.9	40.6	36.27	188649	33980	236304862	2210	1087	30182	68051	50.23	2.41	0.18	0.03	0.48	45.49	1.64	NA	0.0139	0.014	250	parthenogenetic	33;41	Gr-Nem-00862	SMNG_Nem_0957-0961	Pilz-10	yes	Karin Hohberg	SAMN25040739	NA	Germany	NA	NA	NA	NA	80	NA
Nematoda	Cephalobidae	Acrobeloides nanus	290746	9711795545	55	1.76578e+08	25.3	25	22.7	29.7	45.3	36.59	191539	26925	243173970	2609	1106	25939	61100	48.22	2.19	0.13	0.02	0.25	43.96	1.67	0.0154	0.0153	0.0154	300	parthenogenetic	13;14;23;24;31;32;41	Gr-Nem-00863	SMNG_Nem_0892-0931	Hohberg-99	yes	Karin Hohberg	SAMN25040740	NA	Germany	NA	NA	NA	NA	50	1.37715
Nematoda	Dorylaimidae	Mesodorylaimus bastiani	344383	6059122550	NA	NA	38.1	54.5	54	17.4	28.1	46.64	149908	34317	140893789	2397	679	14763	41690	13.94	0.27	0.27	0	0.75	10.57	2.08	NA	0.0209	0.021	1260	sexual	23;31;32;33;41;51	Gr-Nem-00545	SMNG_Nem_4952		no	Karin Hohberg	SAMN25040847	05.12.2019	Germany	Goerlitz	Grenzweg	51.1381	14.9409	100	NA
Nematoda	Heteroderidae	Heterodera schachtii	97005	8813038899	50	176260778	20.3	13.2	12.9	25.2	61.6	32.3	194306	26569	190884950	1513	750	34071	78912	28.99	0.56	0.18	0.02	0.33	24.24	3.66	0.0187	0.0187	0.0187	430	sexual	21	Gr-Nem-00856	SMNG_Nem_ArRoe1868		yes	Florian Grundler	SAMN25040808	NA	Germany	NA	NA	NA	NA	35	1.08297
Nematoda	Hoplolaimidae	Rotylenchus robustus	288490	7925485399	NA	NA	36.4	33.6	33.5	19.5	46.9	34	191096	39557	190154887	2016	715	21102	60968	28.68	0.3	0.07	0	0.32	24	3.99	NA	0.0294	0.0295	1220	sexual	21;23;31;32;41	Gr-Nem-00562	SMNG_Nem_4942-4944		no	Karin Hohberg	SAMN25040896	27.02.2020	Germany	Goerlitz	Grenzweg	51.1381	14.9409	78	NA
Nematoda	Meloidogynidae	Meloidogyne incognita	6306	9053944042	NA	NA	41.5	38.9	36.4	15.6	45.5	29.51	40277	64451	89146552	5389	2333	4325	10565	18.55	0.85	0.1	0	0.6	13.58	3.42	NA	0.0203	0.0204	350	parthenogenetic	21	Gr-Nem-00857	SMNG_Nem_ArRoe1869		yes	Florian Grundler	SAMN25040846	NA	Germany	NA	NA	NA	NA	92	NA
Nematoda	Mononchidae	Prionchulus punctatus	293874	7527500868	55	1.36864e+08	47	57.6	57.2	4.2	38.2	42.73	102443	268651	113780170	9866	798	2208	10976	18.26	3.19	1.19	0	0.72	11.84	1.32	0.0125	0.0125	0.0125	1500	parthenogenetic	31;51	Gr-Nem-00550	SMNG_Nem_2539-2557	Socke-16	yes	Karin Hohberg	SAMN25040884	NA	Germany	NA	NA	NA	NA	94	0.83134
Nematoda	Panagrolaimidae	Panagrellus redivivus	6233	9268413087	100	9.26841e+07	53.6	55.1	53.4	10.4	34.5	48.02	79506	172374	75750140	3143	584	4441	18884	4.73	0.07	0.09	0	0.19	3.77	0.61	0.0222	0.0221	0.0222	1100	sexual	21;24	Gr-Nem-00162	SMNG_Nem_3006-3011	Koenig-18	yes	Karin Hohberg	SAMN25040866	NA	Germany	NA	NA	NA	NA	106	0.817294
Nematoda	Panagrolaimidae	Panagrolaimus detritophagus	310956	6667790261	60	1.1113e+08	50.4	54.6	52.8	14.7	30.7	32.38	111538	1989913	126939912	2843	904	10271	30089	12.56	0.18	0.14	0	0.25	10.18	1.81	0.018	0.018	0.018	620	both	21;23;24;31;32;41	Gr-Nem-00824	SMNG_Nem_0951-0956	Hohberg-07	yes	Karin Hohberg	SAMN25040867	NA	Germany	NA	NA	NA	NA	106	1.14227
Nematoda	Plectidae	Plectus exinocaudatus	2072759	9426806326	85	1.10904e+08	43.1	48.2	47.4	24	27.8	47.4	220392	76604	185353500	2152	488	16462	69305	12.9	0.32	0.13	0.04	0.45	11.13	0.83	0.0133	0.0133	0.0133	340	parthenogenetic	23;31;32;41;51	Gr-Nem-00323	SMNG_Nem_4930-4939	Koenig-17	yes	Karin Hohberg	SAMN25040876	NA	Germany	NA	NA	NA	NA	90	1.6713
Nematoda	Plectidae	Plectus parietinus	211404	7535786080	NA	NA	43.2	44.3	43.9	19.7	36	43.29	148796	109474	199882241	3172	1264	15607	40540	34.09	0.78	0.4	0.01	0.2	31.82	0.88	NA	0.0243	0.0243	900	sexual	31;41	Gr-Nem-00544	SMNG_Nem_4929		no	Karin Hohberg	SAMN25040877	05.12.2019	Germany	Görlitz	Grenzweg	51.1381	14.9409	82	NA
Nematoda	Prismatolaimidae	Prismatolaimus dolichurus	288633	1756710678	10	1.75671e+08	34.7	52.6	51.4	9.1	38.3	46.16	44738	49887	129259875	7186	3740	5383	11562	23.82	0.67	0.28	0	0.19	21.75	0.93	0.00764	0.00762	0.00765	700	parthenogenetic	23;31;32;41;51	Gr-Nem-00598	SMNG_Nem_1998-2001		no	Karin Hohberg	SAMN25040885	15.10.2014	Germany	Bad Bramstedt	NSG Katenmoor	53.9014	9.92724	85	0.735806
Nematoda	Qudsianematidae	Discolaimus major	288457	3961291757	50	7.92258e+07	47.6	61.4	60.4	3.8	34.8	44.4	125835	79798	94605093	4665	284	4039	33427	8.84	0.15	0.23	0.01	0.23	7.61	0.61	0.0112	0.0112	0.0112	1600	parthenogenetic	33	Gr-Nem-00217	SMNG_Nem_ArRoe1388		no	Karin Hohberg	SAMN25040776	20.06.2019	Germany	Goerlitz	Demianiplatz	51.1543	14.9844	104	1.19412
Nematoda	Rhabditidae	Phasmarhabditis papillosa	6243	5890636978	19	3.10034e+08	81.8	64.1	62.7	6.8	29.1	36.49	44044	144660	161959249	11755	5043	3738	8960	22.7	0.23	0.32	0	0.71	20.32	1.12	0.0109	0.0109	0.0109	1600	sexual	21;24	Gr-Nem-00009	SMNG_Nem_2621-2635	Koenig-18	yes	Karin Hohberg	SAMN25040872	NA	Germany	NA	NA	NA	NA	126	0.522393
Nematoda	Rhabditidae	Poikilolaimus oxycercus	96659	7465033107	45	1.6589e+08	67.5	49.3	47.5	11.1	39.6	48.55	152182	1105325	178322452	7218	937	5261	21133	8.12	0.05	0.18	0.01	0.23	6.02	1.63	0.0134	0.0134	0.0135	500	both	12;21;24;31	Gr-Nem-00825	SMNG_Nem_0319-0344	Hohberg-01	yes	Karin Hohberg	SAMN25040879	NA	Germany	NA	NA	NA	NA	97	1.07495
Oribatida	Phthiracaridae	Phthiracarus crinitus	229740	8658942607	26	3.33036e+08	85	81.9	81.3	3.5	14.6	28.92	104773	125146	237269678	7130	3161	8482	20997	38.25	1.67	0.47	0	2.47	29.99	3.65	0.0152	0.0151	0.0152	803	sexual	23;31	Gr-Ori-00797	59094		no	Ricarda Lehmitz	SAMN25040873	13.11.2017	Germany	Darmstadt	Fachhochschule	49.8684	8.68044	131	0.712444
Oribatida	Damaeidae	Oribatida	66551	2129365383	NA	NA	83.2	81.2	80.9	4.2	14.6	30.51	81134	48340	98610469	2249	1051	11401	27490	9.81	0.31	0.1	0	0.18	5.9	3.32	NA	0.0121	0.0121	323	NA	21;31;41	Gr-Ori-00025	59108		no	Ricarda Lehmitz	SAMN25040765	25.05.2018	Germany	Brandenburg	Sernitzmoor	53.0828	13.9196	133	NA
Oribatida	Galumnidae	Galumna lanceata	229834	2935571861	8	3.66946e+08	83	81.2	80.8	3.7	15.1	29.48	89149	51023	131278640	3887	1601	8628	21731	23.97	0.73	0.68	0	0.45	19.61	2.5	0.0173	0.0173	0.0173	600	sexual	12;14;21;23;31;32;33;41;42	Gr-Ori-00036	59108		no	Ricarda Lehmitz	SAMN25040793	25.05.2018	Germany	Brandenburg	Sernitzmoor	53.0828	13.9196	138	0.35776
Oribatida	Nanhermanniidae	Nanhermannia elegantula	66595	6843757929	NA	NA	85.8	81.1	80.5	4.8	14.1	37.97	326877	113456	253035771	3479	338	14905	88398	21.27	1.17	0.16	0.01	0.08	18.08	1.77	NA	0.00761	0.00763	555	parthenogenetic	21;23;31;41	Gr-Ori-00744	59265		no	Ricarda Lehmitz	SAMN24116348	09.07.2019	Germany	Esslingen	Buchenwald	48.7577	9.4202	134	NA
Oribatida	Liacaridae	Liacarus xylariae	198284	8732980359	20	436649018	81.1	80.6	80.3	4.1	15.3	30.1	87267	60111	215763849	6101	2957	9883	22510	37.71	2.02	1.01	0	0.49	32.1	2.09	0.00979	0.00977	0.0098	920	sexual	23;31	Gr-Ori-00741	59259		no	Ricarda Lehmitz	SAMN24116344	05.07.2019	Germany	Fuerth	Fichtenforst	49.6436	8.83687	133	0.494136
Oribatida	Achipteriidae	Achipteria nitens	229768	2643661268	10	2.64366e+08	82.5	80.3	80.2	3.7	16	31.98	85905	43937	108168413	3591	1503	8063	19543	14.98	0.39	0.15	0.01	0.25	11.5	2.68	0.0138	0.0138	0.0138	690	sexual	23;31;42	Gr-Ori-00021	59108		no	Ricarda Lehmitz	SAMN25040738	25.05.2018	Germany	Brandenburg	Sernitzmoor	53.0828	13.9196	131	0.409161
Oribatida	Camisiidae	Camisia spinifer	198258	7567152563	30	2.52238e+08	83.1	80.4	80	6.7	12.9	46.84	876416	116212	385284462	366	263	154257	483724	9.81	0.64	0.23	0	0.12	7.53	1.29	0.0147	0.0147	0.0147	1040	parthenogenetic	14;21;23;31;32;33;41	Gr-Ori-00728	59259		no	Ricarda Lehmitz	SAMN24116359	05.07.2019	Germany	Fuerth	Fichtenforst	49.6436	8.83687	130	1.52746
Oribatida	Phthiracaridae	Phthiracarus laevigatus	229740	9056968614	40	2.26424e+08	83.9	80.8	80	2.9	16.3	31.56	217793	127209	253890087	6393	1130	8730	30814	34.53	2.56	0.36	0.1	2.03	26.54	2.94	0.0212	0.0212	0.0212	1148	sexual	23;31;41	Gr-Ori-00284	59094		no	Ricarda Lehmitz	SAMN25040874	13.11.2017	Germany	Darmstadt	Fachhochschule	49.8684	8.68044	129	1.1213
Oribatida	Scheloribatidae	Liebstadia similis	1250587	1541971934	10	1.54197e+08	81.3	80.2	79.9	3.9	15.9	36.35	44976	79082	84019706	5298	2337	4407	10317	9.46	0.3	0.09	0	0.23	7.28	1.56	0.0131	0.0131	0.0131	550	sexual	13;14;21;22;23;31;32;33;41;42;51	Gr-Ori-00066	59108		no	Ricarda Lehmitz	SAMN25040833	25.05.2018	Germany	Brandenburg	Sernitzmoor	53.0828	13.9196	130	0.544885
Oribatida	Damaeidae	Belba bartosi	2241992	8228900315	30	2.74297e+08	81.4	80	79.6	5.3	14.7	38.67	515267	152367	327617420	2807	278	18965	191639	22.7	1.1	0.16	0.06	0.84	18.04	2.5	0.0104	0.0104	0.0104	695	sexual	21;23;31	Gr-Ori-00727	59261		no	Ricarda Lehmitz	SAMN24116352	15.07.2019	Germany	Conventwald	Fichtenforst	48.0216	7.96874	132	1.19439
Oribatida	Oppiidae	Dissorhina ornata	2202870	2913748000	10	291374800	80.9	80.2	79.5	5	14.8	28.81	83898	63625	126532050	4196	1735	7873	19539	15.69	0.47	0.1	0	0.22	9.21	5.69	0.0128	0.0128	0.0128	300	sexual	14;21;23;24;31;32;33;41;42	Gr-Ori-00054	59108		no	Ricarda Lehmitz	SAMN25040778	25.05.2018	Germany	Brandenburg	Sernitzmoor	53.0828	13.9196	134	0.434259
Oribatida	Euzetidae	Euzetes globulus	334610	5920231133	24	2.46676e+08	80.4	79.3	79	3.1	17.6	31.94	27756	98675	117287773	8448	3684	3542	8842	22.42	0.87	0.14	0	0.7	19.06	1.65	0.0159	0.0159	0.0159	600	sexual	14;21;23;31;33;41	Gr-Ori-00034	59108		no	Ricarda Lehmitz	SAMN25040788	25.05.2018	Germany	Brandenburg	Sernitzmoor	53.0828	13.9196	132	0.475472
Oribatida	Phthiracaridae	Steganacarus magnus	52000	9094984265	40	2.27375e+08	81	79.2	78.9	5.6	15.2	31.09	111817	97594	187610091	5027	2048	9348	23807	29.26	1.91	0.3	0	2.15	21.33	3.57	0.0126	0.0125	0.0126	1380	sexual	21;23;31;51	Gr-Ori-00582	49080		no	Ricarda Lehmitz	SAMN25040904	16.10.2013	Germany	Mueritz National Park	Neustrelitz, Praelank	53.3676	12.9844	133	0.825115
Oribatida	Malaconothridae	Malaconothrus monodactylus	1797415	4644454801	25	185778192	83.6	78.7	78.3	6.1	15.2	30.37	99423	79260	130708617	4022	1215	7207	22343	14.95	0.96	0.2	0	0.15	11.27	2.37	0.0144	0.0144	0.0144	415	parthenogenetic	13;21;23;31;41;42;51	Gr-Ori-00043	59108		no	Ricarda Lehmitz	SAMN25040842	25.05.2018	Germany	Brandenburg	Sernitzmoor	53.0828	13.9196	130	0.703574
Oribatida	Damaeidae	Porobelba spinosa	2886740	7481319821	NA	NA	82	78.8	78.3	5	16.2	30.31	111507	61279	151727553	2775	1229	13649	34240	28.65	0.43	0.09	0	0.45	24	3.68	NA	0.00794	0.00797	325	sexual	14;21;23;31;32;41	Gr-Ori-00746	59261		no	Ricarda Lehmitz	SAMN24116349	15.07.2019	Germany	Conventwald	Fichtenforst	48.0216	7.96874	127	NA
Oribatida	Galumnidae	Galumna obvia	885392	8073987455	15	5.38266e+08	82.5	78.7	78.2	3.4	17.9	26.27	99535	165911	257754634	5479	2573	10848	28191	46.39	2.29	0.53	0	0.87	40.24	2.46	0.021	0.0209	0.021	775	sexual	14;23;31;32;41;42	Gr-Ori-00578	49081		no	Ricarda Lehmitz	SAMN25040794	16.10.2013	Germany	Mueritz National Park	Neustrelitz, Praelank	53.3669	12.9846	135	0.478861
Oribatida	Mesoplophoridae	Mesoplophora pulchra	334620	7986599409	50	1.59732e+08	82.1	78.9	78.2	6.4	14.7	26.69	106395	92838	143982323	3533	1398	9862	25885	27.77	0.93	0.12	0	0.4	20.21	6.11	0.00746	0.00744	0.00748	268	sexual	14;23;31	Gr-Ori-00260	59094		no	Ricarda Lehmitz	SAMN25040848	13.11.2017	Germany	Darmstadt	Fachhochschule	49.8684	8.68044	131	0.901399
Oribatida	Nothridae	Nothrus silvestris	66602	6197294572	NA	NA	80.5	78.3	78	7	14.7	34.35	226819	66631	197659315	2297	623	21152	59003	22.49	2	0.6	0.01	0.23	17.09	2.56	NA	0.0163	0.0164	760	parthenogenetic	23;24;31;32;33;41;42	Gr-Ori-00269	59119		no	Ricarda Lehmitz	SAMN25040858	30.10.2018	Germany	Goerlitz	Loenscher Grund	51.1326	14.9629	131	NA
Oribatida	Ceratozetidae	Edwardzetes edwardsi	2202872	7411793226	70	1.05883e+08	81.6	78.1	77.8	4.6	17.3	40.88	178850	95279	134580065	2857	353	8227	53835	8.71	0.31	0.11	0	0.32	6.6	1.37	0.00991	0.00989	0.00993	770	sexual	14;21;23;31;33;41;51	Gr-Ori-00734	59123		no	Ricarda Lehmitz	SAMN24116330	30.10.2018	Germany	Goerlitz, Friedersdorf	Gr. Nonnenwald	51.087	14.8307	131	1.27103
Oribatida	Galumnidae	Galumnidae	229772	7943674383	24	3.30986e+08	82.3	77.8	77.7	5.2	17	28.18	82570	105167	172454694	4757	2111	8713	22476	34.1	0.61	0.14	0	0.77	29.78	2.8	0.0139	0.0139	0.0139	640	sexual	14;21;23;31;32;41;42;51	Gr-Ori-00277	59093		no	Ricarda Lehmitz	SAMN25040871	16.01.2018	Germany	Bautzen, Wartha	Olbasee, Graben	51.2718	14.6102	131	0.521033
Oribatida	Achipteriidae	Achipteria coleoptrata	229769	3575267725	27	1.32417e+08	82.9	77.8	77.3	4.6	17.6	29.33	44639	53908	115284396	5229	2508	5874	13840	22.81	0.36	0.11	0	0.25	19.38	2.71	0.0149	0.0149	0.0149	590	sexual	13;21;22;23;31;32;33;41;42;51	Gr-Ori-00870	61773		no	Ricarda Lehmitz	SAMN25040737	29.04.2019	Germany	Schwäbische Alb, Münsingen	NA	48.4057	9.46731	134	0.870614
Oribatida	Punctoribatidae	Punctoribates punctum	1720615	3119264600	30	1.03975e+08	81.2	77.6	77.1	3.2	19.2	36.5	64826	175174	89432829	14247	3870	1658	4484	5.45	0.19	0.05	0	0.24	3.4	1.57	0.00701	0.007	0.00703	380	sexual	13;14;21;23;31;33;41	Gr-Ori-00851	62216		no	Ricarda Lehmitz	SAMN25040893	13.05.2020	Germany	Eifel	LSG \Auf Lind bei Esch\""	50.3676	6.62114	128	0.860134
Oribatida	Phenopelopidae	Eupelops torulosus	198282	6723989156	NA	NA	80.7	77.4	77	7.2	15.4	39.17	280995	34069	170503219	1209	286	25100	115907	14.63	0.32	0.15	0	0.23	11.66	2.27	NA	0.00925	0.00928	690	sexual	12;14;21;31;41	Gr-Ori-00737	59262		no	Ricarda Lehmitz	SAMN24116341	09.07.2019	Germany	Esslingen	Fichtenforst	48.7579	9.42997	133	NA
Oribatida	Nanhermanniidae	Nanhermannia nana	198291	4701008050	NA	NA	81.7	77.6	76.9	5.5	16.9	49.59	1349538	88270	512825412	286	254	340017	817453	9.93	0.56	0.1	0.01	0.06	7.82	1.38	NA	0.0131	0.0131	588	parthenogenetic	12;14;21;23;31;33;41;42	Gr-Ori-00265	59119		no	Ricarda Lehmitz	SAMN25040854	30.10.2018	Germany	Goerlitz	Loenscher Grund	51.1326	14.9629	131	NA
Oribatida	Mycobatidae	Minunthozetes semirufus	1979919	3077435974	30	1.02581e+08	80.8	76.9	76.5	4.1	19	33.62	57591	103626	90613228	11496	3591	2115	5497	6.21	0.16	0.05	0	0.42	3.45	2.13	0.00743	0.00741	0.00745	305	sexual	14;21;23;31;41;42	Gr-Ori-00045	59108		no	Ricarda Lehmitz	SAMN25040850	25.05.2018	Germany	Brandenburg	Sernitzmoor	53.0828	13.9196	129	0.883332
Oribatida	Phenopelopidae	Eupelops occultus	2234141	3047298547	20	1.52365e+08	82	77.1	76.5	5.8	17.1	43.57	306152	57682	166068473	1034	265	21421	135988	8.05	0.22	0.05	0	0.22	5.87	1.69	0.0148	0.0148	0.0149	520	sexual	12;14;21;23;31;32;33;41;42	Gr-Ori-00060	59108		no	Ricarda Lehmitz	SAMN25040787	25.05.2018	Germany	Brandenburg	Sernitzmoor	53.0828	13.9196	129	1.08994
Oribatida	Ceratozetidae	Fuscozetes fuscipes	1686651	4472204479	NA	NA	82.1	77.3	76.5	4.2	18.5	32.56	33220	437264	103095180	8394	3648	3270	7916	19.45	0.58	0.11	0.02	0.64	16.39	1.71	NA	0.00857	0.00861	698	sexual	23;31;41	Gr-Ori-00027	59108		no	Ricarda Lehmitz	SAMN25040792	25.05.2018	Germany	Brandenburg	Sernitzmoor	53.0828	13.9196	130	NA
Oribatida	Camisiidae	Camisiidae	128013	7178341513	35	2.05095e+08	80.7	76.5	76.3	6.6	16.9	38.77	318536	112553	235716442	2999	325	14735	91942	20.8	1.39	0.49	0	0.15	17.35	1.42	0.011	0.011	0.011	910	parthenogenetic	14;21;23;31	Gr-Ori-00247	59112		no	Ricarda Lehmitz	SAMN25040804	03.07.2018	Germany	Donau/Lech	Kaisheim	48.7289	10.9821	134	1.1493
Oribatida	Ceratozetidae	Ceratozetes gracilis	1686620	3464335477	10	3.46434e+08	79.7	76.5	76.3	3.1	20.4	33.48	102275	121104	129574757	4515	1633	6907	18719	17.86	0.51	0.35	0	0.57	14.67	1.76	0.019	0.019	0.019	545	parthenogenetic	13;14;21;22;23;24;31;32;33;41	Gr-Ori-00158	59117		no	Ricarda Lehmitz	SAMN25040759	30.10.2018	Germany	Goerlitz	Loenscher Grund	51.1324	14.9723	129	0.374025
Oribatida	Hermanniellidae	Hermanniella punctulata var. septentrionalis	885393	8352414088	NA	NA	81.8	76.9	76.2	8.4	14.7	30.07	295657	28380	274969434	1627	723	43414	106928	38.5	2.1	0.71	0	0.32	33.21	2.16	NA	0.0144	0.0144	608	sexual	31	Gr-Ori-00739	59119		no	Ricarda Lehmitz	SAMN24116342	30.10.2018	Germany	Goerlitz	Loenscher Grund	51.1326	14.9629	132	NA
Oribatida	Oribatulidae	Zygoribatula sp.	1251916	1004390241	7	1.43484e+08	76.5	75.7	75.5	7.8	16.5	36.96	66332	29350	92415356	2863	1368	9040	20677	11.06	0.17	0.15	0	0.25	8.93	1.56	0.0213	0.0212	0.0213	380	sexual	12;14;21;23;24;31	ori_SMG_180821_19	59098		no	Ricarda Lehmitz	SAMN25040923	10.04.2018	Germany	Ostritz	Klosterwald, Saupantsche	50.9977	14.9118	130	0.64408
Oribatida	Euphthiracaridae	Microtritia minima	229747	8084117902	NA	NA	75.8	75.2	74.8	7.3	17.5	32.36	143688	97424	133173469	4564	474	6567	28858	14.36	0.93	0.08	0	0.15	9.91	3.29	NA	0.00942	0.00946	370	parthenogenetic	14;21;23;31;32;41	Gr-Ori-00742	59260		no	Ricarda Lehmitz	SAMN24116345	15.07.2019	Germany	Heidelberg	Fichtenforst	49.4624	8.75382	132	NA
Oribatida	Chamobatidae	Chamobates pusillus	503572	9715282280	NA	NA	78.7	75	74.6	8.7	16.3	33.31	103588	76487	130272363	3299	1210	9979	26089	14.77	0.4	0.12	0.02	0.7	11.4	2.13	NA	0.0153	0.0154	370	sexual	14;21;23;31;32;41	Gr-Ori-00730	59254		no	Ricarda Lehmitz	SAMN25040760	02.07.2019	Germany	Harz, Goslar	Lange Bramke Kamm	51.8599	10.4174	130	NA
Oribatida	NA	Oribatida	66551	3240300052	20	1.62015e+08	79.8	74.6	74.2	7.7	17.7	34.61	92813	106288	118624550	3303	1299	8675	22907	17.44	0.28	0.09	0	0.35	15.12	1.6	0.0182	0.0181	0.0182	505	sexual	14;23;31;32;41;42	Gr-Ori-00057	59108		no	Ricarda Lehmitz	SAMN25040864	25.05.2018	Germany	Brandenburg	Sernitzmoor	53.0828	13.9196	131	0.732183
Oribatida	Nanhermanniidae	Nanhermannia coronata cf.	198290	9306351267	35	2.65896e+08	79.7	74.6	74	8.8	16.6	33.15	279863	82659	261763973	2453	663	23039	73801	31.09	1.65	0.28	0.02	0.11	27.07	1.96	0.0131	0.0131	0.0131	525	parthenogenetic	14;21;23;24;31;41;51	Gr-Ori-00579	49068		no	Ricarda Lehmitz	SAMN25040853	02.10.2013	Germany	Harz	Brocken, Heinrichshoehe	51.7915	10.6222	127	0.984461
Oribatida	Nothridae	Nothrus palustris	198293	2663138347	10	2.66314e+08	76.7	74.1	73.8	9.3	16.6	35.82	269673	32244	203600192	1852	420	27147	80087	20.47	1.48	0.36	0.02	0.17	16.17	2.27	0.0142	0.0142	0.0143	1095	parthenogenetic	23;31;41	Gr-Ori-00051	59108		no	Ricarda Lehmitz	SAMN25040857	25.05.2018	Germany	Brandenburg	Sernitzmoor	53.0828	13.9196	130	0.764512
Oribatida	Carabodidae	Carabodes femoralis	229793	5939304573	4	1484826143	77.9	74	73.8	7.9	18.1	31.31	237077	30644	169963288	1225	449	33853	91538	20.77	1.06	0.14	0	0.27	16.19	3.11	0.0163	0.0163	0.0164	658	sexual	21;23;24;31;41	Gr-Ori-00239	59119		no	Ricarda Lehmitz	SAMN25040756	30.10.2018	Germany	Goerlitz	Loenscher Grund	51.1326	14.9629	137	0.114467
Oribatida	Oribellidae	Pantelozetes paolii	1979943	2424807624	22	1.10219e+08	76.7	74	73.7	2.7	23.3	30.88	20199	282901	78939601	17387	6364	1140	3012	8.7	0.27	0.14	0	0.32	5.34	2.63	0.0128	0.0128	0.0129	393	sexual	14;21;23;31;32;33;41	Gr-Ori-00072	59108		no	Ricarda Lehmitz	SAMN25040868	25.05.2018	Germany	Brandenburg	Sernitzmoor	53.0828	13.9196	120	0.71621
Oribatida	Eremaeidae	Eueremaeus valkanovi	1401269	8199534024	40	2.04988e+08	78.8	74	73.6	4.3	21.7	34.29	66642	126737	150289937	9587	3480	3843	10438	21.13	0.48	0.3	0	0.51	17.54	2.3	0.0148	0.0148	0.0148	498	sexual	31;41;42	Gr-Ori-00735	59093		no	Ricarda Lehmitz	SAMN24116340	16.01.2018	Germany	Bautzen, Wartha	Olbasee, Graben	51.2718	14.6102	124	0.733163
Oribatida	NA	Oribatida	66551	3998930047	NA	NA	76.8	73.7	73.5	7.8	18.5	36.9	74997	32653	85244791	3275	1163	6946	17508	5.57	0.18	0.06	0	0.17	3.48	1.68	NA	0.00457	0.0046	253	sexual	23;31;33	Gr-Ori-00743	59263		no	Ricarda Lehmitz	SAMN24116346	15.07.2019	Germany	Heidelberg	Fichtenforst	49.4677	8.74336	128	NA
Oribatida	Damaeidae	Metabelba pulverosa	229776	7855966358	40	196399159	75.5	73.4	72.9	6.6	20	37.71	306065	171857	230732188	2776	350	14895	90799	14.36	0.3	0.23	0	0.44	10.69	2.7	0.0112	0.0112	0.0112	465	sexual	13;14;23;31;33;41;42	Gr-Ori-00263	59093		no	Ricarda Lehmitz	SAMN25040849	16.01.2018	Germany	Bautzen, Wartha	Olbasee, Graben	51.2718	14.6102	115	1.17481
Oribatida	Scheloribatidae	Scheloribates initialis	1979935	6313345856	NA	NA	72.7	72.5	72.1	9.4	18.1	40.35	124339	22509	111893667	1724	665	16767	42721	15.45	0.6	0.16	0	0.36	13.15	1.18	NA	0.0176	0.0176	500	sexual	14;21;23;24;31;32;41;42;51	Gr-Ori-00748	59253		no	Ricarda Lehmitz	SAMN24116350	09.07.2019	Germany	Schleswig-Holstein	Bornhoeved	54.0983	10.2409	127	NA
Oribatida	Scheloribatidae	Scheloribates latipes	1979937	8755369646	60	1.45923e+08	75.1	72.3	72.1	4.2	23.5	40.84	113628	74927	121968761	3827	1072	7163	21774	18.14	0.4	0.12	0	0.68	15.69	1.25	0.0162	0.0161	0.0162	505	sexual	14;21;23;31;32;41;42;51	Gr-Ori-00583	50274		no	Ricarda Lehmitz	SAMN25040897	21.05.2014	Germany	Schleswig-Holstein	Meldorfer Speicherkoog	54.0937	8.9711	116	0.835844
Oribatida	Liacaridae	Adoristes ovatus	708363	7407794946	NA	NA	74.3	71.7	71	9.2	19.1	32.83	151610	19974	158544676	2124	928	20686	48529	17.92	0.24	0.13	0	0.18	14.82	2.55	NA	0.00835	0.00838	635	sexual	14;21;23;31;32;41;51	Gr-Ori-00725	59254		no	Ricarda Lehmitz	SAMN24116329	02.07.2019	Germany	Harz, Goslar	Lange Bramke Kamm	51.8599	10.4174	133	NA
Oribatida	Liacaridae	Liacarus coracinus	198285	7179559900	NA	NA	73.2	70.2	70	11.6	18.2	29.24	234932	24037	222499348	1551	740	39347	91241	30.26	0.63	0.36	0	0.27	26.29	2.71	NA	0.01	0.0101	875	sexual	14;21;23;24;31;41;51	Gr-Ori-00740	59254		no	Ricarda Lehmitz	SAMN24116343	02.07.2019	Germany	Harz, Goslar	Lange Bramke Kamm	51.8599	10.4174	127	NA
Oribatida	Quadroppiidae	Quadroppia sp.	1250640	4495554784	50	8.99111e+07	70.3	70	69.5	3	27	33.38	42483	176838	75699913	12861	4034	1403	4010	8.67	0.23	0.26	0.01	0.18	5.37	2.62	0.00738	0.00736	0.0074	190	sexual	23;31	Gr-Ori-00064	59108		no	Ricarda Lehmitz	SAMN25040894	25.05.2018	Germany	Brandenburg	Sernitzmoor	53.0828	13.9196	117	0.841942
Oribatida	Nanhermanniidae	Nanhermannia comitalis	1979898	3135215956	10	3.13522e+08	73.7	69.6	69.2	12.9	17.5	32.16	191749	46679	207658633	2745	1094	20116	49778	26.01	1.33	0.3	0	0.09	22.29	2	0.0116	0.0116	0.0116	635	sexual	23;31;41	Gr-Ori-00048	59108		no	Ricarda Lehmitz	SAMN25040852	25.05.2018	Germany	Brandenburg	Sernitzmoor	53.0828	13.9196	121	0.662342
Oribatida	Steganacaridae	Atropacarus striculus	229743	5437514062	NA	NA	69	69	68.4	12.4	18.6	34.84	227647	23895	155543178	1126	417	32467	90793	16.04	0.49	0.08	0	0.17	12.8	2.5	NA	0.0129	0.013	695	parthenogenetic	12;13;14;21;23;31;41;51	Gr-Ori-00726	59256		no	Ricarda Lehmitz	SAMN24116347	09.07.2019	Germany	Solling	Fichtenforst	51.7647	9.57969	123	NA
Oribatida	Tectocepheidae	Tectocepheus velatus	229869	6559216018	70	9.37031e+07	71.5	68.7	68.4	3.2	28.1	41.45	197087	429319	122583296	3304	271	3088	74217	6.61	0.14	0.1	0	0.28	4.66	1.43	0.0202	0.0201	0.0202	300	parthenogenetic	12;14;21;23;31;32;33;41;42;51	Gr-Ori-00855	59256		no	Ricarda Lehmitz	SAMN25040912	09.07.2019	Germany	Solling	Fichtenforst	51.7647	9.57969	106	1.30821
Oribatida	Chamobatidae	Chamobates voigtsi	198262	6565153239	NA	NA	67.4	66.4	65.9	13.3	20.3	32.68	79506	22206	98158516	2277	1138	12659	27751	10.39	0.19	0.06	0	0.29	7.66	2.19	NA	0.00704	0.00707	350	sexual	13;14;21;23;24;31;32;33;41	Gr-Ori-00838	59264		no	Ricarda Lehmitz	SAMN25040761	15.07.2019	Germany	Conventwald	Buchenwald	48.0222	7.96408	120	NA
Oribatida	Ctenobelbidae	Ctenobelba pectinigera	1401282	6854963806	12	5.71247e+08	62.6	65.3	65.1	18.3	16.4	34.74	259258	14052	190119658	1068	515	48013	112615	18.97	0.4	0.23	0	0.3	14.86	3.18	0.013	0.013	0.013	500	sexual	14;23;24;31	Gr-Ori-00731	61889		no	Ricarda Lehmitz	SAMN25040767	15.05.2019	Germany	Eifel	Alendorf, Kalvarienberg	50.37	6.6	116	0.332815
Oribatida	Gustaviidae	Gustavia microcephala	1685391	3672970636	4	918242659	68.2	64.6	64.2	12.7	22.7	29.1	167776	24142	136994580	1460	563	25248	61237	24.79	1.07	0.85	0	0.58	18.89	3.4	0.0184	0.0184	0.0184	515	sexual	14;23;31	Gr-Ori-00039	59108		no	Ricarda Lehmitz	SAMN25040800	25.05.2018	Germany	Brandenburg	Sernitzmoor	53.0828	13.9196	128	0.149192
Oribatida	Eniochthoniidae	Eniochthonius minutissimus	229763	8239608211	25	3.29584e+08	26.8	63.2	62.4	19.1	17.7	28.33	169863	62802	177097067	2041	901	23846	55992	37.24	1.74	0.2	0	0.17	31.1	4.03	0.0199	0.0199	0.0199	375	parthenogenetic	14;21;23;31;41;42	Gr-Ori-00577	50277		no	Ricarda Lehmitz	SAMN25040782	21.05.2014	Germany	Nord-Ostsee-Kanal	Schafstedt	54.1264	9.31925	116	0.537335
Oribatida	Hermanniidae	Hermannia gibba	229873	5184971564	NA	NA	45.4	41.2	41.1	22.5	36.3	41.92	505464	26136	242342056	504	270	79093	261652	21.92	0.73	0.31	0.09	0.33	18.91	1.55	NA	0.0215	0.0216	860	sexual	23;24;31;32;33;41;51	Gr-Ori-00251	59123		no	Ricarda Lehmitz	SAMN25040806	30.10.2018	Germany	Goerlitz, Friedersdorf	Gr. Nonnenwald	51.087	14.8307	85	NA
Oribatida	Tenuialidae	Hafenrefferia gilvipes	2547479	6895446122	4	1723861531	38.7	36.7	36.4	24.4	38.9	32.67	231871	21937	125084416	633	335	45476	116558	23.66	1.04	0.27	0	0.48	19.22	2.65	0.0147	0.0147	0.0147	920	sexual	14;23;31	Gr-Ori-00798	59119		no	Ricarda Lehmitz	SAMN25040801	30.10.2018	Germany	Goerlitz	Loenscher Grund	51.1326	14.9629	80	0.0725606
Oribatida	Tectocepheidae	Tectocepheus sarekensis	198303	891802555	NA	NA	31	30.6	30.5	28.1	41.3	38.46	152259	13231	82406483	713	343	32326	74459	4.4	0.17	0.07	0	0.17	2.37	1.62	NA	0.0128	0.0129	328	parthenogenetic	13;14;21;23;31;32;41	Gr-Ori-00069	59108		no	Ricarda Lehmitz	SAMN25040911	25.05.2018	Germany	Brandenburg	Sernitzmoor	53.0828	13.9196	73	NA
Oribatida	Euphthiracaridae	Euphthiracaridae	229745	1579041662	2	789520831	23.5	30.3	30.1	28	41.7	31.68	235489	29674	133817636	716	366	49253	116701	29.89	1.22	0.41	0.08	0.72	24.39	3.07	NA	0.026	0.0261	437.5	parthenogenetic	14;21;23;31;32	Metainvert_57	59094		no	Ricarda Lehmitz	SAMN24116381	13.11.2017	Germany	Darmstadt	Fachhochschule	49.8684	8.68044	70	0.169492
Oribatida	Hermanniellidae	Hermanniella dolosa	2664692	1104426893	NA	NA	23.7	24.6	24.5	25.1	50.3	42.34	324582	17148	122408968	339	258	91161	197918	10.88	0.64	0.41	0	0.32	7.91	1.6	NA	0.0257	0.0258	608	sexual	31	Gr-Ori-00152	59117		no	Ricarda Lehmitz	SAMN25040807	30.10.2018	Germany	Goerlitz	Loenscher Grund	51.1324	14.9723	71	NA
Oribatida	Suctobelbidae	Allosuctobelba grandis	2234146	1770262556	4	442565639	8.5	6.7	6.7	26.2	67.1	38.32	397117	20454	143417875	334	270	130384	253550	10.99	0.89	0.96	0.01	0.37	5.57	3.19	0.00749	0.00747	0.00751	450	sexual	21;23;31;51	Gr-Ori-00237	59120		no	Ricarda Lehmitz	SAMN25040746	30.10.2018	Germany	Goerlitz	Landeskrone	51.1279	14.9376	21	0.32406
Oribatida	NA	Oribatida	66551	1697378056	10	1.69738e+08	3.5	6.2	6.2	21.8	72	42.3	207803	15154	78822992	380	277	67182	130062	2.87	0.06	0.03	0	0.08	0.64	2.06	0.00382	0.0038	0.00383	238	parthenogenetic	31;41	Gr-Ori-00732	59253		no	Ricarda Lehmitz	SAMN25040768	09.07.2019	Germany	Schleswig-Holstein	Bornhoeved	54.0983	10.2409	24	0.464381
Oribatida	Camisiidae	Platynothrus peltifer	128015	1643066383	NA	NA	3.9	4.1	4.1	12.8	83.1	43.24	558860	25068	227944111	375	261	132236	324154	10.62	0.61	0.21	0	0.14	8.66	1	NA	0.0202	0.0203	875	parthenogenetic	14;21;22;23;24;31;32;33;41;42;51	Gr-Ori-00869	61774		no	Ricarda Lehmitz	SAMN25040875	29.04.2019	Germany	Schwäbische Alb, Bad Urach	NA	48.4895	9.35606	11	NA
Oribatida	Hypochthoniidae	Hypochthonius sp.	66580	265791398	NA	NA	1.5	2.2	2.2	4.5	93.3	30.88	103545	10600	39912374	384	290	34426	64573	18.06	0.88	0.19	0	0.16	13.81	3.02	NA	0.0282	0.0284	675	parthenogenetic	23;31;33;41;42	ori_SMG_180821_16	59108		no	Ricarda Lehmitz	SAMN25040811	25.05.2018	Germany	Brandenburg	Sernitzmoor	53.0828	13.9196	10	NA
Pauropoda	Pauropodidae	Allopauropus danicus	244970	6892192662	12	5.74349e+08	31.1	32.3	32.3	40.3	27.4	41.43	291041	19697	209176956	967	522	60640	134446	20.89	0.32	0.17	0.56	0.1	16.7	2.31	0.00958	0.00956	0.00959	1550	sexual	31	Gr-Pau-00787	62173		no	Ulrich Burkhardt	SAMN24116375	24.06.2020	Germany	Harz	Braunlage, Waldgaststaette \Rinderstall\""	51.7161	10.5635	80	0.364198
Symphyla	Scolopendrellidae	Symphylella vulgaris	1288507	8703780384	9	9.67087e+08	50.7	48.3	47.9	28.5	23.2	34.97	221285	35382	455156025	2909	1608	45516	98158	38.16	1.14	0.87	1.23	0.49	33.07	1.36	0.0139	0.0138	0.0139	2950	sexual	22;23;31	Gr-Sym-00793	62172		no	Ulrich Burkhardt	SAMN25040909	24.06.2020	Germany	Harz	Eckertal	51.884	10.6445	92	0.470647
Symphyla	Scolpendrellidae	Scolopendrellopsis subnuda	NA	12579977853	21	5.99047e+08	32.8	37.2	36.9	33.1	29.7	38.34	221032	50833	337981992	2593	1343	36669	82064	28.69	1.38	0.71	0.01	0.42	24.93	1.24	0.0227	0.0227	0.0227	1600	sexual	23;31;32;41	Gr-Sym-00789	62162		no	Ulrich Burkhardt	SAMN24116377	24.06.2020	Germany	Harz	Eckertal	51.884	10.6445	74	0.5642
Tardigrada	Isohypsibiidae	Isohypsibius dastychi	947160	4380959442	50	8.76192e+07	64.6	64	60.9	11.7	24.3	51.13	451079	121767	239080872	547	295	62812	218760	5.62	0.22	0.12	0	0.35	3.31	1.62	0.0189	0.0189	0.019	335	sexual	13;33	Gr-Tar-00864	SMNG_Tar_1067-1096	Koenig-09	yes	Karin Hohberg	SAMN25040813	NA	Germany	NA	NA	NA	NA	113	2.72864
Tardigrada	Macrobiotidae	Paramacrobiotus richtersi	697321	11020730441	70	1.57439e+08	57.7	56.6	47.8	15.9	27.5	44.98	228809	112446	291522701	5584	1113	12281	40750	17.05	0.34	1.45	0	0.97	13.58	0.71	0.0253	0.0253	0.0253	690	parthenogenetic	13;33	Gr-Tar-00820	SMNG_Tar_0263-0285	Hohberg-99	yes	Karin Hohberg	SAMN25040869	NA	Germany	NA	NA	NA	NA	89	1.85165
				Total read bases mapped on the assembly	Mode of the assembly coverage distribution.	Genome size estimated with ModEST.	Complete BUSCOs, using the closest odb_10 set to the taxon group (e.g. Collembola = Arthropoda Odb10)	Complete BUSCOs using the Metazoa Odb10	Complete and single-copy BUSCOs using the Metazoa Odb10	Fragmented BUSCOs using the Metazoa Odb10	Missing BUSCOs using the Metazoa Odb10														Unclassified repeats	Other repeats	Estimates of effective population size				Three categories: sexual, parthenogenetic or both				When applicable										Number of metazoan genes used for the phylogenetic placement of the taxon.
