# Supplementary material for: MetaInvert: A new soil invertebrate genome resource provides insights into below-ground biodiversity and evolution
Source: Research Square preprint supplement (doi:10.21203/rs.3.rs-2706746/v1), 2023-03-27
Supplement: Supplementary file 4 [file 164d787bdb3c72448e2bb837.xlsx]

## Sheet: Sheet1
Species used to compute a metazoan core gene set (to filter the OMA OGs.)
Scientific name | NCBI ID | common name
Amphimedon queenslandica 400682 (sea sponge)
Caenorhabditis elegans 6239 (nematode)
Drosophila melanogaster 7227 (fly)
Helobdella robusta 6412 (leech)
Homo sapiens 9606 (human)
Ixodes scapularis 6945 (tick)
Lepisosteus oculatus 7918 (fish)
Lottia gigantea 225164 (limpet)
Nematostella vectensis 45351 (sea anemone)
Strigamia maritima 126957 (centipede)
Strongylocentrotus purpuratus 7668 (sea urchin)
