# Supplementary material for: MetaInvert: A new soil invertebrate genome resource provides insights into below-ground biodiversity and evolution
Source: Research Square preprint supplement (doi:10.21203/rs.3.rs-2706746/v1), 2023-03-27
Supplement: Supplementary file 5 [file b12ba01b16868a7d0b76d406.xlsx]

## Sheet: Sheet1
An fDOG-Assembly run was set up separately for each of the six major taxon groups, with three public reference species each to provide the nearest protein annotation information available.
Taxonomic group | n species | fDOG reference species
Collembola (78) Drosophila melanogaster, Strigamia maritima, Ixodes scapularis
Chilopoda, Diplopoda (28) Strigamia maritima, Ixodes scapularis, Drosophila melanogaster
Nematoda (9) Caenorhabditis elegans, Ixodes scapularis,Strigamia maritima
Gamasina, Astigmata, Oribatida (57) Ixodes scapularis, Drosophila melanogaster, Strigamia maritima
Tardigrada (2) Ixodes scapularis, Strigamia maritima, Drosophila melanogaster
Enchytraeidae (3) Helobdella robusta,Lottia gigantea,Caenorhabditis elegans
